# Supplementary material for: Diffuse, Adult-Onset Nesidioblastosis/Non-Insulinoma Pancreatogenous Hypoglycemia Syndrome (NIPHS): Review of the Literature of a Rare Cause of Hyperinsulinemic Hypoglycemia
Source: MDPI journal article supplement (doi:10.3390/biomedicines11061732), 2023-06-16
Supplement: s1 [file s1]

| Number | Author               | Year | Cases (Special) feature                                                                                                                                                                                                          | Pathologic features pancreas                                                                                                                                                                                       | Clinical symptoms/laboratory findings                              | Therapy                              | Evaluation                                                                                                                                 | Literature                 |
|--------|----------------------|------|----------------------------------------------------------------------------------------------------------------------------------------------------------------------------------------------------------------------------------|--------------------------------------------------------------------------------------------------------------------------------------------------------------------------------------------------------------------|--------------------------------------------------------------------|--------------------------------------|--------------------------------------------------------------------------------------------------------------------------------------------|----------------------------|
|        |                      |      |                                                                                                                                                                                                                                  |                                                                                                                                                                                                                    |                                                                    |                                      |                                                                                                                                            | *full text not available   |
| 1      | Lang                 | 1925 | 1                                                                                                                                                                                                                                | nodular hyperplasia of islets ("adenomatosis")                                                                                                                                                                     |                                                                    |                                      | unclear, if case of NIPHS/nesidiobalstosis and adult*                                                                                      | Cited in Frantz, 1944      |
| 2      | John                 | 1931 | 1<br>Diabetes, Hyperthyroidism, Cirrhosis of the liver, liver/gallbladder carcinoma<br>Interstitial pancreatitis; insulin discontinued                                                                                           | atrophy and hypertrophy of islets                                                                                                                                                                                  | hypoglycemia (30 mg/dL)                                            |                                      | unclear, if case of NIPHS/nesidiobalstosis and adult; alternatively hyperplasia due to pancreatitis and hypoglycemia due to liver failure* | Cited in Frantz, 1944      |
| 3      | Frantz               | 1944 | 11<br>Report of different cases of insulin producing neoplasms/adenomas/adenomatosis; among them 11 cases (10 aged > 16; 1x girl with 7 year) with hypertrophy and/or hyperplasia of islets of Langerhans without neoplasm       | islet hyperplasia or hypertrophy or number of islets increased                                                                                                                                                     | hypoglycemia reported for all patients                             | some: partial Pancreatectomy         | possible cases of NIPHS/nesidiobalstosis                                                                                                   |                            |
| 4      | Summerskill et al.   | 1959 | 1<br>jejunal ulceration, malabsorption, hypergastrinemia                                                                                                                                                                         | islet cell hyperplasia                                                                                                                                                                                             |                                                                    |                                      | unclear, if adult*                                                                                                                         | Cited in Creutzfeldt, 1975 |
| 5      | Friedlander          | 1960 | 22<br>6 with history of chronic pancreatitis                                                                                                                                                                                     | islet cell hyperplasia                                                                                                                                                                                             | hyperinsulinism                                                    |                                      | possible cases of NIPHS/nesidiobalstosis; unclear, if all adult cases*                                                                     | Cited in Sandler, 1975     |
| 6      | Franksson et al.     | 1960 | 1<br>chief-cell hyperplasia of parathyroid; adenomata pancreas, gastro-duodenal ulcers; possibly MEN1 with gastrinoma                                                                                                            | islet cell hyperplasia                                                                                                                                                                                             |                                                                    |                                      | unclear, if adult; possible nesidiobalstosis in MEN1*                                                                                      |                            |
| 7      | Bloodworth           | 1963 | 34<br>post mortem analysis; all patients treatment with tolbutamid (sufonyl urea)                                                                                                                                                | islet hyperplasia, neo formation of islets, increase in $\alpha$ cells, decrease in $\beta$ cells                                                                                                                  |                                                                    |                                      | changes associated with sulfonylurea therapy; unclear if all patients affected from the changes*                                           |                            |
| 8      | Ellison et al.       | 1964 | 26<br>all Zollinger-Ellison syndrome patients                                                                                                                                                                                    | islet cell hyperplasia                                                                                                                                                                                             |                                                                    |                                      | unclear, if all adult (but many)                                                                                                           |                            |
| 9      | Knight               | 1967 | 1<br>Insulinoma, Diabetes mellitus                                                                                                                                                                                               | generalized islet cell hyperplasia                                                                                                                                                                                 |                                                                    |                                      | unclear, if adult; possible background nesidiobalstosis in insulinoma*                                                                     |                            |
| 10     | Cavallero et al.     | 1967 | 2<br>Zollinger-Ellison syndrome                                                                                                                                                                                                  | islet hyperplasia                                                                                                                                                                                                  | not reported                                                       |                                      | no patient characteristics reported                                                                                                        |                            |
| 11     | Paloyan et al.       | 1967 | 1<br>69-yr-old man; calcified pancreatitis, hyperparathyroidism                                                                                                                                                                  | islet cell hyperplasia (A cell excess)                                                                                                                                                                             |                                                                    |                                      |                                                                                                                                            |                            |
| 12     | Brown et al.         | 1968 | 1<br>Associated with Zollinger-Ellison syndrome                                                                                                                                                                                  | islet hyperplasia                                                                                                                                                                                                  |                                                                    | Resection                            | unclear, if adult*                                                                                                                         | Cited in Ouyang, 2011      |
| 13     | Vance et al.         | 1969 | 6<br>Family with multiple endocrine adenomatosis, hyperinsulinism                                                                                                                                                                |                                                                                                                                                                                                                    | hyperinsulinism                                                    |                                      | unclear, if all adult, unclear if pathological examination*                                                                                |                            |
| 14     | Sircus et al.        | 1970 | 1<br>water-losing, electrolyte-losing diarrhoea                                                                                                                                                                                  | mild hyperplasia of islet tissue, overrepresentation of beta cells                                                                                                                                                 |                                                                    | Partial resection pancreas           | possibly VIPoma with islet cell hyperplasia                                                                                                |                            |
| 15     | Brown et al.         | 1971 | 1<br>associated with cystic fibrosis                                                                                                                                                                                             | nesidiobalstosis                                                                                                                                                                                                   |                                                                    |                                      | *                                                                                                                                          | Cited in Jabri, 2004       |
| 16     | Hight et al.         | 1971 | 1<br>53-yr-old man; duodenal ulcer despite vagotomy/Pyloroplasty                                                                                                                                                                 | increased number islet cells                                                                                                                                                                                       | hyperacidity, ulcer                                                | Partial resection pancreas           | Zollinger-Ellison-Syndrome with islet cell hyperplasia*                                                                                    |                            |
| 17     | Greene et al.        | 1972 | 1<br>hypergastrinemia (Zollinger-Ellison-Syndrome)                                                                                                                                                                               | islet cell hyperplasia                                                                                                                                                                                             |                                                                    |                                      | unclear, if adult*                                                                                                                         |                            |
| 18     | Jacobs et al.        | 1972 | 1<br>wateray diarrhea and hypokalemia                                                                                                                                                                                            | non- $\beta$ islet cell hyperplasia                                                                                                                                                                                |                                                                    |                                      | unclear, if adult; possibly VIPoma with islet cell hyperplasia                                                                             |                            |
| 19     | Vance et al.         | 1972 | 3 patients from a family with familial multiple endocrine adenomatosis (=MEN1); 1 non-family member suspected to have multiple endocrine adenomatosis (= MEN1) patients in 4 study aged 17-72 years; excessive insulin secretion | islet cell hyperplasia                                                                                                                                                                                             | hypoglycemia, not all patients symptomatic                         | Diazoxide or Pancreatectomy          | islet cell hyperplasia                                                                                                                     |                            |
| 20     | Larsson et al.       | 1973 | 1<br>Associated with gastrinoma                                                                                                                                                                                                  | increased number of islets, ductulo-insular complexes                                                                                                                                                              | recurrent duodenal ulcers                                          | Resection                            | unclear, if really adult*                                                                                                                  |                            |
| 21     | Creutzfeldt et al.   | 1975 | 5<br>Zollinger-Ellison syndrome patients                                                                                                                                                                                         | islet cell hyperplasia                                                                                                                                                                                             |                                                                    |                                      | unclear, if all adult                                                                                                                      |                            |
| 22     | Verner et al.        | 1974 | 11<br>watery diarrhoea syndrome; at least 11 of 54 reported cases only diffuse islet cell hyperplasia                                                                                                                            | diffuse non- $\beta$ islet cell hyperplasia                                                                                                                                                                        |                                                                    | total pancreatectomy                 | possibly VIPoma with islet cell hyperplasia*                                                                                               | Cited in Lesna, 1977       |
| 23     | Stefanini et al.     | 1974 | 129<br>series of many communications/thorough review of literature                                                                                                                                                               | islet cell hyperplasia                                                                                                                                                                                             | all patients with hypoglycemia                                     | corpuscaudal/subtotal pancreatectomy | description of cases a bit unclear; approx. 129 adult cases                                                                                |                            |
| 24     | Jahnke et al.        | 1975 | 1<br>sensorineural deafness, recurrent facial paralysis (unilateral)                                                                                                                                                             | islet cell hyperplasia                                                                                                                                                                                             | hypoglycemia                                                       | Subtotal pancreatectomy              | unclear, if adult; possible NIPH/nesidiobalstosis*                                                                                         |                            |
| 25     | Rastogi et al.       | 1975 | 1<br>study with administration of insulin secretagogues/glucose/amino acids/ glucagon                                                                                                                                            |                                                                                                                                                                                                                    |                                                                    |                                      | probably islet cell hyperplasia*                                                                                                           |                            |
| 26     | Sandler et al.       | 1975 | 1<br>Insulin-dependent Diabetes mellitus; later developing fasting hypoglycemia: 59-yr-old man; introducing C-peptide for measuring endogenous hyperinsulinism                                                                   | islet cell hyperplasia, neoproliferation of islet cells (ductulo-insular complexes)                                                                                                                                | fasting hypoglycemia                                               | 2/3 pancreatectomy                   | Subtotal pancreatectomy                                                                                                                    |                            |
| 27     | Bradley et al.       | 1976 | 1<br>48-yr-old male                                                                                                                                                                                                              | islet cell hyperplasia                                                                                                                                                                                             | hypoglycemia                                                       | 95% pancreatectomy                   |                                                                                                                                            | Cited in Martignoni, 2003  |
| 28     | Mendelsohn           | 1976 | 1<br>kidney transplant recipient; multiple malignancies, 54-yr-old man, autopsy                                                                                                                                                  | islet cell hyperplasia                                                                                                                                                                                             |                                                                    |                                      | unclear significance*                                                                                                                      |                            |
| 29     | Larsson et al.       | 1977 | 14<br>different diseases ranging from insulinoma, to glucagonoma, and Zollinger-Ellison syndrome; as well as pernicious anemia and atrophic gastritis                                                                            | different "types" of islet cell hyperplasia and/or nesidiobalstosis                                                                                                                                                | some with hyperinsulinism                                          |                                      | unclear, if all adult as age not reported                                                                                                  |                            |
| 30     | Greider et al.       | 1977 | 9<br>unusual perinuclear inclusions                                                                                                                                                                                              | islet cell hyperplasia                                                                                                                                                                                             |                                                                    | Partial pancreatectomy               | unclear significance; unclear, if any adult cases*                                                                                         |                            |
| 31     | Lesna et al.         | 1977 | 1<br>39-yr-old man; laxative abuse; diarrhea                                                                                                                                                                                     | increased number of islets; neoformation islets; ductulo-insular complexes                                                                                                                                         |                                                                    |                                      |                                                                                                                                            |                            |
| 32     | Ingemansson et al.   | 1977 | 1<br>32-yr-old woman; detection by pancreatic vein catheterization                                                                                                                                                               | localized islet cell hyperplasia                                                                                                                                                                                   | hyperinsulinemic hypoglycemia                                      | distal Hemipancreatectomy            |                                                                                                                                            |                            |
| 33     | Hayashi et al.       | 1977 | 1<br>11-yr-old girl                                                                                                                                                                                                              | nesidiobalstosis                                                                                                                                                                                                   | fasting hypoglycemia and hyperinsulinism                           | 80% Resection                        | unclear, if really adult (11-yr-old)                                                                                                       |                            |
| 34     | Efendic et al.       | 1978 | 1<br>Somatostatin treatment of hyperinsulinism                                                                                                                                                                                   | islet cell hyperplasia                                                                                                                                                                                             |                                                                    |                                      | possibly NIPHS/nesidiobalstosis; unclear, if adult*                                                                                        |                            |
| 35     | Schwartz et al.      | 1978 | 1<br>secretory diarrhea with VIP level increase                                                                                                                                                                                  | islet cell hyperplasia                                                                                                                                                                                             |                                                                    |                                      | unclear, if really adult*                                                                                                                  |                            |
| 36     | Schikman et al.      | 1978 | 1<br>10-yr-old boy                                                                                                                                                                                                               | islet cell hyperplasia                                                                                                                                                                                             | fasting hypoglycemia                                               |                                      | unclear, if really adult (10-yr-old)*                                                                                                      |                            |
| 37     | Ingemansson et al.   | 1978 | 2<br>associated with metastasizing insulinoma,                                                                                                                                                                                   | islet cell hyperplasia                                                                                                                                                                                             | organic hypoglycemia                                               |                                      | unclear, if really adult*                                                                                                                  |                            |
| 38     | Kidd et al.          | 1979 | 1<br>46-yr-old woman; watery diarrhea, hypokalemia, hypochlorhydria                                                                                                                                                              | diffuse pancreatic islet cell hyperplasia                                                                                                                                                                          |                                                                    | 75% pancreatectomy                   | (pseudo)VIPoma with islet cell hyperplasia                                                                                                 |                            |
| 39     | Varas Lorenzo et al. | 1979 | 1<br>58-yr-old, hypergastrinemia, recurrent ulcers                                                                                                                                                                               | islet cell hyperplasia                                                                                                                                                                                             |                                                                    | subtotal pancreatectomy              | Zollinger-Ellison-Syndrome with islet cell hyperplasia*                                                                                    |                            |
| 40     | Dahms et al.         | 1980 | 3<br>to 15-yr-old patients (additional 10 patients with nesidiobalstosis and hyperplasia, who 6 all presented with symptoms in the first year of life)                                                                           | nesidiobalstosis but no hyperplasia (5 patients; defined as scattered islet cells throughout acinar tissue); some with additional ductulo-insular complexes; nesidiobalstosis + islet cell hyperplasia (1 patient) | hyperinsulinism (not reported in all)                              | Subtotal pancreatectomy              | unclear, if really "adult"                                                                                                                 |                            |
| 41     | Tomita et al.        | 1980 | 2<br>one with watery diarrhea, one without                                                                                                                                                                                       | pancreatic polypeptide cell hyperplasia, large/atypical islets                                                                                                                                                     |                                                                    |                                      | unclear, if really adult*                                                                                                                  |                            |
| 42     | Friesen et al.       | 1980 | 6<br>patients in a series with 26 patients                                                                                                                                                                                       | islet cell hyperplasia with or without nesidiobalstosis                                                                                                                                                            |                                                                    | some with distal pancreatectomy      | unclear, if really adult (age not reported)                                                                                                |                            |
| 43     | Leong et al.         | 1980 | 1<br>associated with metastasizing insulinoma, multiple adenomas, 40-yr-old woman                                                                                                                                                | hyperplasia of islets, nesidiobalstosis                                                                                                                                                                            |                                                                    | 75% resection                        | possible case of background nesidiobalstosis in insulinoma                                                                                 |                            |
| 44     | Brennan et al.       | 1980 | 1<br>59-yr-old woman; biliary cirrhosis, gastrojejunostomy, portocaval anastomosis                                                                                                                                               | islet hyperplasia, increase in number of islets                                                                                                                                                                    | hypoglycemia, hyperinsulinism, hyperglucagonemia                   | pancreatic resection                 | possibly NIPHS/nesidiobalstosis secondary to gastrectomy                                                                                   |                            |
| 45     | Reichardt et al.     | 1980 | 7<br>Report of cases of islet cell hyperplasia in selective vein catheterization study                                                                                                                                           | 1x islet cell hyperplasia with macroadenoma, 1x nesidiobalstosis                                                                                                                                                   | organic hyperinsulinism                                            | operation                            | unclear, how many (adult) cases*                                                                                                           |                            |
| 46     | Glaser et al.        | 1981 | 2<br>20-yr-old male and 58-yr-old female                                                                                                                                                                                         | islet cell hyperplasia                                                                                                                                                                                             | symptomatic hypoglycemia                                           | near-total pancreatectomy            |                                                                                                                                            |                            |
| 47     | Duncan et al.        | 1981 | 1<br>22-yr-old woman                                                                                                                                                                                                             | islet cell hyperplasia                                                                                                                                                                                             |                                                                    | distal pancreatectomy                | not reported, if all adult                                                                                                                 |                            |
| 48     | Bonfils et al.       | 1981 | 13<br>Zollinger-Ellison syndrome                                                                                                                                                                                                 | abnormal shape and size of islets, increased number, ductulo-insular complexes                                                                                                                                     | fasting hypoglycemia and hyperinsulinism                           | 75% Resection                        | *                                                                                                                                          | Cited in Martignoni, 2003  |
| 49     | Nathan et al.        | 1981 | 1<br>58-yr-old woman                                                                                                                                                                                                             | similar findings like in adults                                                                                                                                                                                    | hypoglycemia (?)                                                   | 50-100% Resection                    | unclear, if all cases really "adult"*                                                                                                      | Cited in Martignoni, 2003  |
| 50     | Harness et al.       | 1981 | 6<br>11-57 years old patients                                                                                                                                                                                                    |                                                                                                                                                                                                                    |                                                                    |                                      | nesidiobalstosis interpreted as variant/normal/mildly abnormal stimulation; not clear, if all adult*                                       |                            |
| 51     | Bartow et al.        | 1981 | 20<br>Autopsy study on patients with pancreatic fibrosis                                                                                                                                                                         | (minimal) nesidiobalstosis                                                                                                                                                                                         | no hypoglycemia                                                    |                                      | unclear, if really adult; thought to compensate for autoantibody-syndrome*                                                                 | Cited in Karnauchow, 1982  |
| 52     | Jennette et al.      | 1982 | 1<br>scleroderma, anti-insulin receptor antibody induced diabetes mellitus                                                                                                                                                       | islet cell hyperplasia                                                                                                                                                                                             | hyperinsulinism                                                    |                                      |                                                                                                                                            |                            |
| 53     | Cho et al.           | 1982 | 2<br>1x islet cell hyperplasia with adenoma, 1x nesidiobalstosis                                                                                                                                                                 | 1x islet cell hyperplasia with adenoma, 1x nesidiobalstosis                                                                                                                                                        | no clinical signs of hyperinsulinism/diabetes or pancreatic tumors |                                      | nesidiobalstosis interpreted as variant/normal/mildly abnormal stimulation                                                                 |                            |
| 54     | Karnauchow           | 1982 | 76<br>Autopsy study of 207 adults                                                                                                                                                                                                | (minimal) nesidiobalstosis (defined by ductulo-insular complexes)                                                                                                                                                  |                                                                    |                                      |                                                                                                                                            |                            |

|     |                       |      |    |                                                                                                                                                                                                                                       |                                                                                                                                                                                                                                                                                                                               |                                                                                         |                                                          |                                                                                                  |                           |
|-----|-----------------------|------|----|---------------------------------------------------------------------------------------------------------------------------------------------------------------------------------------------------------------------------------------|-------------------------------------------------------------------------------------------------------------------------------------------------------------------------------------------------------------------------------------------------------------------------------------------------------------------------------|-----------------------------------------------------------------------------------------|----------------------------------------------------------|--------------------------------------------------------------------------------------------------|---------------------------|
| 55  | NEJM Case Reports     | 1983 | 1  |                                                                                                                                                                                                                                       |                                                                                                                                                                                                                                                                                                                               |                                                                                         |                                                          |                                                                                                  | Cited in Service, 1999    |
| 56  | Weidenheim et al.     | 1983 | 5  | 29-56-yr-old; hypoglycemia in some related to exercise; one case with additional insulinoma                                                                                                                                           | nesidioblastosis (defined as islet cells scattered throughout acinar tissue)/islet cell hyperplasia                                                                                                                                                                                                                           | hyperinsulinemic hypoglycemia                                                           | all partial pancreatectomy                               |                                                                                                  |                           |
| 57  | Zhu et al.            | 1983 | 1  | concomitant insulinoma                                                                                                                                                                                                                | islet cell hyperplasia                                                                                                                                                                                                                                                                                                        |                                                                                         | reoperation                                              | unclear, if really adult*                                                                        |                           |
| 58  | Oliver et al.         | 1983 | 1  | 32-yr-old woman; MEN1 syndrome with pancreatic carcinoma                                                                                                                                                                              | nesidioblastosis                                                                                                                                                                                                                                                                                                              | hyperinsulinemic hypoglycemia                                                           |                                                          | *                                                                                                |                           |
| 59  | Keller et al.         | 1983 | 1  | 47-yr-old woman                                                                                                                                                                                                                       | increase in number of islets, size variability, aggregated islets, ductulo-insular complexes                                                                                                                                                                                                                                  | hyperinsulinemic hypoglycemia                                                           | distal pancreatectomy + Diazoxide                        |                                                                                                  |                           |
| 60  | Rayman et al.         | 1984 | 1  | 25-yr-old woman; chlorpropamide-induced (sulphonylurea)                                                                                                                                                                               | islet cell hyperplasia and nesidioblastosis                                                                                                                                                                                                                                                                                   | hyperinsulinemic hypoglycemia                                                           | Subtotal pancreatectomy                                  | *                                                                                                |                           |
| 61  | Bauman et al.         | 1984 | 1  | 26-yr-old woman                                                                                                                                                                                                                       | nesidioblastosis                                                                                                                                                                                                                                                                                                              | hyperinsulinemic hypoglycemia                                                           | surgical intervention                                    | *                                                                                                |                           |
| 62  | Gould et al.          | 1984 | 2  | 29 and 63-yr-old woman                                                                                                                                                                                                                | "adult nesidiodyplasia"                                                                                                                                                                                                                                                                                                       |                                                                                         | partial pancreatectomies                                 | *                                                                                                | Cited in Albers, 1989     |
| 63  | Harrison et al.       | 1984 | 3  | by Harness, 1981                                                                                                                                                                                                                      | 2x islet cell hyperplasia, 1x nesidioblastosis                                                                                                                                                                                                                                                                                | hyperinsulinemic hypoglycemia                                                           | distal pancreatectomy                                    |                                                                                                  |                           |
| 64  | Tomita et al.         | 1985 | 1  | 66-yr-old man; watery diarrhea, hypokalemia, achlorhydria                                                                                                                                                                             | islet cell hyperplasia, mainly pancreatic polypeptide and glucagon cells                                                                                                                                                                                                                                                      |                                                                                         | surgery                                                  |                                                                                                  |                           |
|     |                       |      |    |                                                                                                                                                                                                                                       | nesidioblastosis (defined as islet cells scattered throughout acinar tissue); A and B cells; also intermediate cells (acinar-islet cells) regarded as neoformation of islets                                                                                                                                                  | hyperinsulinemic hypoglycemia                                                           |                                                          | possibly insulinoma with background nesidioblastosis*                                            |                           |
| 65  | Bani et al.           | 1985 | 2  | both patients with additional insulinoma                                                                                                                                                                                              | increased number of islets; nesidioblastosis (defined as islet cells scattered throughout acinar tissue); many A and B cells; increase in islet size, irregular islet shapes                                                                                                                                                  |                                                                                         |                                                          | unclear, if really adult*                                                                        |                           |
| 66  | Bani Sacchi et al.    | 1985 | 4  | all patients with hypergastrinemia                                                                                                                                                                                                    |                                                                                                                                                                                                                                                                                                                               |                                                                                         |                                                          |                                                                                                  |                           |
|     |                       |      |    | 35-yr-old man; additional insulinoma; islet cell surface autoantibodies present; higher proliferative capacity of islet proliferation (in vitro) of specimens from nesidioblastosis                                                   | islet cell hyperplasia, ductal proliferation and budding; 8-cell degranulation                                                                                                                                                                                                                                                | hyperinsulinemic hypoglycemia                                                           | partial pancreatectomy                                   | possibly insulinoma with background nesidioblastosis                                             |                           |
| 67  | Campbell et al.       | 1985 | 1  | patient                                                                                                                                                                                                                               |                                                                                                                                                                                                                                                                                                                               |                                                                                         |                                                          | possibly insulinoma with background nesidioblastosis                                             |                           |
| 68  | Madeira et al.        | 1986 | 1  | 36-yr-old woman, additional small insulinoma                                                                                                                                                                                          | nesidioblastosis (ductulo-insular complexes)                                                                                                                                                                                                                                                                                  | fasting hypoglycemia                                                                    | total pancreatectomy                                     | *                                                                                                |                           |
| 69  | Illyés et al.         | 1986 | 1  |                                                                                                                                                                                                                                       | nesidioblastosis                                                                                                                                                                                                                                                                                                              |                                                                                         |                                                          | *                                                                                                |                           |
| 70  | Klöppel et al.        | 1986 | 3  | case series of nine adult patients with MEN1                                                                                                                                                                                          | nesidioblastosis (as ductulo-insular complexes), no islet cell hyperplasia                                                                                                                                                                                                                                                    | some with hypoglycemia                                                                  | partial pancreatectomies                                 | suggested that nesidioblastosis is not a reliable criterion for MEN1                             |                           |
| 71  | Weinstock et al.      | 1986 | 1  | 32-yr-old man                                                                                                                                                                                                                         | islet cell hyperplasia                                                                                                                                                                                                                                                                                                        | hyperinsulinemic hypoglycemia; elevation of fasting insulin                             | 50% pancreatectomy                                       |                                                                                                  |                           |
| 72  | Ray et al.            | 1986 | 5  | adult patients with genetic alpha 1-Antitrypsin deficiency                                                                                                                                                                            | islet cell hyperplasia; some with nesidioblastosis                                                                                                                                                                                                                                                                            |                                                                                         |                                                          |                                                                                                  |                           |
| 73  | Kovacs et al.         | 1986 | 1  | 30-yr-old woman                                                                                                                                                                                                                       | nesidioblastosis and peliosis of pancreatic islets                                                                                                                                                                                                                                                                            |                                                                                         |                                                          | *                                                                                                |                           |
|     |                       |      |    |                                                                                                                                                                                                                                       |                                                                                                                                                                                                                                                                                                                               |                                                                                         |                                                          | unclear, if adult; unclear if related to the endocrine tumor or to the pancreatitis/obstruction* |                           |
| 74  | Odaira et al.         | 1987 | 1  | localized pancreatitis, obstructive pancreatic duct, endocrine tumor                                                                                                                                                                  | nesidioblastosis in the pancreatic part with obstruction                                                                                                                                                                                                                                                                      |                                                                                         | partial resection + somatostatin analogue                | suspected to be overlap syndrome of MEN1 and MEN2                                                |                           |
| 75  | Jenkins et al.        | 1987 | 1  | 63-yr-old man, medullary thyroid carcinoma, watery diarrhea, flushing                                                                                                                                                                 | pancreatic nesidioblastosis and microadenosis (PP hypersecretion)                                                                                                                                                                                                                                                             |                                                                                         |                                                          | *                                                                                                |                           |
| 76  | Carlson et al.        | 1987 | 1  |                                                                                                                                                                                                                                       | nesidioblastosis                                                                                                                                                                                                                                                                                                              | persistent hypoglycemia                                                                 |                                                          | *                                                                                                |                           |
|     |                       |      |    | 30-yr-old woman; MEN1, GHRH-producing tumor, hyperparathyroidism,                                                                                                                                                                     | nesidioblastosis                                                                                                                                                                                                                                                                                                              |                                                                                         | Subtotal pancreatectomy                                  | *                                                                                                |                           |
| 77  | Asa et al.            | 1987 | 1  | hyperprolactinemia, multiple endocrine pancreatic tumors                                                                                                                                                                              | nesidioblastosis                                                                                                                                                                                                                                                                                                              | hypoglycemia                                                                            |                                                          |                                                                                                  |                           |
|     |                       |      |    | 2x adult with 8-cell adenomas and islet hyperplasia (aberrant reaction to secretin stimulation of insulin release; independent of MEN1); 1x with nesidioblastosis (normal response to secretin stimulation; symptoms from 2 years on) | nesidioblastosis or islet cell hyperplasia                                                                                                                                                                                                                                                                                    | hypoglycemia                                                                            | subtotal pancreatectomy                                  |                                                                                                  |                           |
| 78  | Glaser et al.         | 1988 | 3  |                                                                                                                                                                                                                                       | islet cell hyperplasia and adenomatosis                                                                                                                                                                                                                                                                                       | hyperinsulinemic hypoglycemia                                                           | 2/3 pancreatectomy                                       |                                                                                                  |                           |
| 79  | Roncart et al.        | 1988 | 1  | 25-yr-old woman; more rapid growth of the islets cells in culture than normal cells                                                                                                                                                   | nesidioblastosis                                                                                                                                                                                                                                                                                                              |                                                                                         |                                                          | unclear, if adult*                                                                               |                           |
| 80  | Kohnert et al.        | 1988 | 1  |                                                                                                                                                                                                                                       |                                                                                                                                                                                                                                                                                                                               |                                                                                         |                                                          | likely first report of nesidioblastosis associated with glucagonoma                              |                           |
| 81  | Bales et al.          | 1988 | 1  | 35-yr-old white woman, tumor in head of pancreas, cholecystectomy, additional (silent) glucagonoma                                                                                                                                    | nesidioblastosis, scattered A cells throughout acinar tissue                                                                                                                                                                                                                                                                  |                                                                                         | pancreatectomy                                           | unclear, if really adult*                                                                        |                           |
| 82  | Lamberts et al.       | 1988 | 1  |                                                                                                                                                                                                                                       | nesidioblastosis                                                                                                                                                                                                                                                                                                              |                                                                                         | somatostatin analogue                                    | *                                                                                                |                           |
| 83  | Woltering et al.      | 1988 | 1  |                                                                                                                                                                                                                                       | nesidioblastosis                                                                                                                                                                                                                                                                                                              |                                                                                         | somatostatin analogue                                    | *                                                                                                |                           |
| 84  | Derizhanova           | 1989 | 1  |                                                                                                                                                                                                                                       | nesidioblastosis                                                                                                                                                                                                                                                                                                              |                                                                                         |                                                          | likely adult*                                                                                    |                           |
| 85  | McHenry et al.        | 1989 | 3  | 3 women (29, 42, 63-yr-old)                                                                                                                                                                                                           | nesidioblastosis (neoformation of islets from ducts)                                                                                                                                                                                                                                                                          | hyperinsulinemic hypoglycemia                                                           | near-total pancreatectomy                                |                                                                                                  |                           |
| 86  | Sawady et al.         | 1989 | 1  | Patient with Zollinger-Ellison syndrome                                                                                                                                                                                               | islet cell hyperplasia                                                                                                                                                                                                                                                                                                        |                                                                                         |                                                          | *                                                                                                |                           |
| 87  | Risaliti et al.       | 1989 | 1  | Hypertension, choristoma                                                                                                                                                                                                              | nesidioblastosis of heterotopic pancreas                                                                                                                                                                                                                                                                                      |                                                                                         |                                                          | *                                                                                                |                           |
| 88  | Chines et al.         | 1989 | 1  |                                                                                                                                                                                                                                       | nesidioblastosis                                                                                                                                                                                                                                                                                                              | hyperinsulinism                                                                         |                                                          | *                                                                                                |                           |
|     |                       |      |    |                                                                                                                                                                                                                                       | nesidioblastosis, ductulo-insular complexes, islet apposition to ducts, islet cell hypertrophy, islet enlargement                                                                                                                                                                                                             | hyperinsulinemic hypoglycemia                                                           | 75% pancreatectomy                                       |                                                                                                  |                           |
| 89  | Albers et al.         | 1989 | 1  | 43-yr-old woman                                                                                                                                                                                                                       | nesidioblastosis, diffuse islet cell hyperplasia                                                                                                                                                                                                                                                                              | hyperinsulinemic hypoglycemia                                                           |                                                          | *                                                                                                | Cited in Martignoni, 2003 |
| 90  | Fong et al.           | 1989 | 3  |                                                                                                                                                                                                                                       | nesidioblastosis                                                                                                                                                                                                                                                                                                              | hyperinsulinemic hypoglycemia                                                           |                                                          | unclear, if (all) adult*                                                                         | Cited in Carneiro, 2002   |
| 91  | Fajans et al.         | 1989 | 15 |                                                                                                                                                                                                                                       | nesidioblastosis                                                                                                                                                                                                                                                                                                              | hyperinsulinemic hypoglycemia                                                           | subtotal pancreatectomies                                | *                                                                                                |                           |
| 92  | Martinez Valls et al. | 1990 | 2  | 45 and 73-yr-old males                                                                                                                                                                                                                | nesidioblastosis                                                                                                                                                                                                                                                                                                              | hyperinsulinemic hypoglycemia                                                           | somatostatin analogue                                    | *                                                                                                |                           |
| 93  | Mozell et al.         | 1990 | 1  | clinical nesidioblastosis                                                                                                                                                                                                             |                                                                                                                                                                                                                                                                                                                               | hyperinsulinemic hypoglycemia                                                           |                                                          | *                                                                                                |                           |
| 94  | Alhindawi et al.      | 1990 | 1  | 52-yr-old woman, secretory diarrhea                                                                                                                                                                                                   | islet cell hyperplasia                                                                                                                                                                                                                                                                                                        |                                                                                         |                                                          | *                                                                                                |                           |
| 95  | Kohnert et al.        | 1990 | 7  | histological study                                                                                                                                                                                                                    |                                                                                                                                                                                                                                                                                                                               |                                                                                         |                                                          | unclear, if adult*                                                                               |                           |
| 96  | Bani et al.           | 1991 | 1  | malignant glucagonoma                                                                                                                                                                                                                 | nesidioblastosis (scattered B cell throughout pancreas parenchyma)                                                                                                                                                                                                                                                            |                                                                                         |                                                          | *                                                                                                |                           |
| 97  | Todia et al.          | 1991 | 1  | with malignang microglucagonoma                                                                                                                                                                                                       | islet cell hyperplasia (A cell excess)                                                                                                                                                                                                                                                                                        |                                                                                         |                                                          | *                                                                                                |                           |
| 98  | Kimura et al.         | 1991 | 5  | 5 patients from an autopsy study of 800 adults showed islet cell hyperplasia                                                                                                                                                          | hyperplasia of islets of Langerhans                                                                                                                                                                                                                                                                                           | no clinical symptoms documented                                                         |                                                          |                                                                                                  | Cited in Ouyang, 2011     |
| 99  | Böttiger et al.       | 1992 | 1  | concomitant adenomatosis                                                                                                                                                                                                              | nesidioblastosis                                                                                                                                                                                                                                                                                                              | organic hyperinsulinism                                                                 |                                                          | *                                                                                                |                           |
| 100 | Burman et al.         | 1992 | 2  | adult onset hyperinsulinism in two siblings                                                                                                                                                                                           | islet cell hyperplasia                                                                                                                                                                                                                                                                                                        | organic hyperinsulinism                                                                 |                                                          | *                                                                                                |                           |
|     |                       |      |    |                                                                                                                                                                                                                                       | nesidioblastosis (defined as diffuse hyperplasia + apparent budding of islets from pancreatic ducts)                                                                                                                                                                                                                          | hyperinsulinemic hypoglycemia                                                           | 50% distal pancreatectomy                                | possibly insulinoma with background nesidioblastosis                                             |                           |
| 101 | Andrews et al.        | 1992 | 1  | 60-yr-old male; concomitant insulinoma                                                                                                                                                                                                |                                                                                                                                                                                                                                                                                                                               |                                                                                         |                                                          | possibly insulinoma with background nesidioblastosis/hyperplasia*                                |                           |
| 102 | Tibaldi et al.        | 1992 | 1  | concomitant adenomatosis of the pancreas                                                                                                                                                                                              | 8-cell islet cell hyperplasia but no nesidioblastosis                                                                                                                                                                                                                                                                         | postprandial hypoglycemia, no fasting hypoglycemia                                      | distal pancreatectomy                                    | one case possibly insulinoma with background nesidioblastosis*                                   |                           |
| 103 | Chen et al.           | 1993 | 2  | 43-yr-old woman (insulinoma resected years ago), 52-yr-old female                                                                                                                                                                     | diffuse islet cell hyperplasia, ductulo-insular complexes, termed "nesidiodyplasia"                                                                                                                                                                                                                                           | hypoglycemia                                                                            | 75-80% pancreatectomy                                    | possibly insulinoma with background nesidioblastosis*                                            |                           |
|     |                       |      |    | 58-yr-old woman with insulinoma, chronic pancreatitis, villous adenomatosis of pancreatic duct                                                                                                                                        | islet cell hyperplasia (B, A and D cells)                                                                                                                                                                                                                                                                                     | hypoglycemia                                                                            | pancreatectomy                                           | possibly insulinoma with background nesidioblastosis*                                            |                           |
| 104 | Gaulier et al.        | 1993 | 1  |                                                                                                                                                                                                                                       |                                                                                                                                                                                                                                                                                                                               | hyperinsulinemic hypoglycemia                                                           |                                                          | *                                                                                                |                           |
| 105 | Tavcar et al.         | 1994 | 7  |                                                                                                                                                                                                                                       |                                                                                                                                                                                                                                                                                                                               | hyperinsulinemic hypoglycemia                                                           |                                                          | *                                                                                                |                           |
| 106 | Geoghegan et al.      | 1994 | 2  |                                                                                                                                                                                                                                       | islet cell hyperplasia                                                                                                                                                                                                                                                                                                        | hyperinsulinemic hypoglycemia                                                           | distal pancreatectomy                                    | unclear, if really adult*                                                                        |                           |
| 107 | Farley et al.         | 1994 | 2  |                                                                                                                                                                                                                                       | pancreatic nesidioblastosis with gastrin/PP (pancreatic polypeptide) secretion                                                                                                                                                                                                                                                | hyperinsulinemic hypoglycemia                                                           | pancreatectomy                                           | *                                                                                                |                           |
| 108 | Losada et al.         | 1995 | 1  |                                                                                                                                                                                                                                       | nesidioblastosis                                                                                                                                                                                                                                                                                                              | hyperinsulinemic hypoglycemia                                                           |                                                          | *                                                                                                | Cited in Martignoni, 2003 |
| 109 | Lechleitner et al.    | 1995 | 1  | young woman                                                                                                                                                                                                                           | nesidioblastosis                                                                                                                                                                                                                                                                                                              | hyperinsulinemia                                                                        |                                                          | *                                                                                                |                           |
| 110 | Walmesley et al.      | 1995 | 1  | 84-yr-old woman                                                                                                                                                                                                                       | diffuse nesidioblastosis                                                                                                                                                                                                                                                                                                      | hyperinsulinemia                                                                        | pancreatectomy                                           | *                                                                                                |                           |
| 111 | Bell et al.           | 1995 | 1  | diabetes mellitus reversed by nesidioblastosis                                                                                                                                                                                        | nesidioblastosis                                                                                                                                                                                                                                                                                                              | hyperinsulinemic hypoglycemia                                                           |                                                          | unclear, if really adult*                                                                        |                           |
|     |                       |      |    | 9 of 28 MEN1 patients had nesidioblastosis but no islet cell hyperplasia (16- to 57-yr old;                                                                                                                                           | nesidioblastosis but no islet cell hyperplasia                                                                                                                                                                                                                                                                                | 8 patients with hyperinsulinemia; all with hypoglycemia (of the whole study population) |                                                          |                                                                                                  |                           |
| 112 | Le Bodic et al.       | 1996 | 9  | 17 male, 11 female)                                                                                                                                                                                                                   | nesidioblastosis but no islet cell hyperplasia                                                                                                                                                                                                                                                                                |                                                                                         | surgery                                                  |                                                                                                  |                           |
| 113 | Galtzia et al.        | 1996 | 1  | 40-yr-old man, predominant cardiac manifestations; sudden death                                                                                                                                                                       | increase in number and size of islets; nesidioblastosis (autopsy specimen)                                                                                                                                                                                                                                                    | hyperinsulinemic hypoglycemia                                                           | death (arrhythmia?)                                      |                                                                                                  |                           |
|     |                       |      |    |                                                                                                                                                                                                                                       | hyperplasia of islets (predominantly pancreatic head); increased in size and number; ductulo-insular complexes; dysplastic changes: increased nuclear-cytoplasmic ratio, hyperchromatism, coarse chromatin, prominent nucleoli; increase in total endocrine area (7% in head); hyperplasia more pronounced in pancreatic head |                                                                                         |                                                          |                                                                                                  |                           |
| 114 | Kim et al.            | 1996 | 1  | 50-yr-old man, repeated loss of consciousness                                                                                                                                                                                         |                                                                                                                                                                                                                                                                                                                               | hyperinsulinemic hypoglycemia                                                           | 70% proximal pancreatic resection                        |                                                                                                  |                           |
| 115 | Fuller et al.         | 1997 | 1  | 24-yr-old woman                                                                                                                                                                                                                       | nesidioblastosis                                                                                                                                                                                                                                                                                                              | hyperinsulinemic hypoglycemia                                                           | subtotal distal pancreatectomy + postoperative diazoxide |                                                                                                  |                           |
| 116 | Martella et al.       | 1997 | 3  | 3 adult women; all with gastrinomas (pancreatic/duodenal)                                                                                                                                                                             | islet cell hyperplasia (PP expressing cells)                                                                                                                                                                                                                                                                                  |                                                                                         | surgical resection                                       |                                                                                                  |                           |
| 117 | Garcia et al.         | 1997 | 1  | 30-yr-old woman                                                                                                                                                                                                                       | diffuse nesidioblastosis; varying number and size of islets; diffuse proliferation, ducto-endocrine proliferation; irregular/large islets; nuclear variability (size/staining)                                                                                                                                                | hypoglycemia                                                                            | subtotal pancreatectomy                                  |                                                                                                  |                           |

|     |                                  |      |    |                                                                                                                                                                            |                                                                                                                                       |                                                   |                                                                                                      |                                                                                                                                        |                      |
|-----|----------------------------------|------|----|----------------------------------------------------------------------------------------------------------------------------------------------------------------------------|---------------------------------------------------------------------------------------------------------------------------------------|---------------------------------------------------|------------------------------------------------------------------------------------------------------|----------------------------------------------------------------------------------------------------------------------------------------|----------------------|
| 118 | Lee et al.                       | 1997 | 1  | 69-yr-old woman                                                                                                                                                            | diffuse nesidioblastosis                                                                                                              | hyperinsulinemic hypoglycemia                     | subtotal pancreatectomy                                                                              | *                                                                                                                                      |                      |
| 119 | Röher et al.                     | 1997 | 1  | 18-yr-old man                                                                                                                                                              | islet cell hyperplasia                                                                                                                | hyperinsulinemic hypoglycemia                     | subtotal pancreatectomy                                                                              |                                                                                                                                        |                      |
|     | Sanjuan Portugal et al.          |      |    |                                                                                                                                                                            |                                                                                                                                       |                                                   |                                                                                                      |                                                                                                                                        |                      |
| 120 | al.                              | 1997 | 1  |                                                                                                                                                                            | nesidioblastosis                                                                                                                      |                                                   |                                                                                                      | *                                                                                                                                      |                      |
| 121 | Conget et al.                    | 1997 | 1  |                                                                                                                                                                            | nesidioblastosis                                                                                                                      | no clinical findings                              |                                                                                                      |                                                                                                                                        |                      |
| 122 | Brown et al.                     | 1998 | 2  | with glucagonoma                                                                                                                                                           | A cell hyperplasia                                                                                                                    | diabetes                                          |                                                                                                      | *                                                                                                                                      |                      |
|     |                                  |      |    |                                                                                                                                                                            | islet cell hyperplasia, nesidioblastosis; normal proportion insulin/glucagon/somatostatin positive cells                              |                                                   |                                                                                                      |                                                                                                                                        |                      |
| 123 | Ueda et al.                      | 1998 | 1  | 23-yr-old man                                                                                                                                                              |                                                                                                                                       | hyperinsulinemic hypoglycemia                     | 75% pancreatectomy                                                                                   |                                                                                                                                        |                      |
|     |                                  |      |    | Large studygroup from Japan with 1085 cases of organic hyperinsulinism; 4.1% of patients with nesidioblastosis (2.6% with concomitant insulinoma; 1.6% without)            |                                                                                                                                       |                                                   |                                                                                                      |                                                                                                                                        |                      |
| 124 | Soga et al.                      | 1998 | 44 |                                                                                                                                                                            | nesidioblastosis                                                                                                                      | hyperinsulinemic hypoglycemia                     |                                                                                                      | unclear, if all adult*                                                                                                                 |                      |
| 125 | Pereira et al.                   | 1998 | 1  | 46-yr-old woman                                                                                                                                                            | "nodular hyperplasia" (focal and unencapsulated)                                                                                      | hyperinsulinemic hypoglycemia                     | partial pancreatectomy                                                                               |                                                                                                                                        |                      |
| 126 | Rinker et al.                    | 1998 | 1  |                                                                                                                                                                            | nesidioblastosis                                                                                                                      | hypoglycemia                                      | Diazoxide                                                                                            | *                                                                                                                                      |                      |
| 127 | Glaser et al.                    | 1998 | 5  | 2-36-yr-old; activating Glucokinase mutations (familial)                                                                                                                   |                                                                                                                                       | hyperinsulinemic hypoglycemia                     | Diazoxide                                                                                            |                                                                                                                                        |                      |
| 128 | Pasieka et al.                   | 1999 | 1  | 37-yr-old woman; watery diarrhea                                                                                                                                           | islet cell hyperplasia (PP expressing cells)                                                                                          |                                                   | surgery                                                                                              |                                                                                                                                        |                      |
|     |                                  |      |    | all with exclusively postprandial hypoglycemia but negative fasting test, 16-78-yr-old (4 men/1 woman)                                                                     |                                                                                                                                       |                                                   |                                                                                                      |                                                                                                                                        |                      |
| 129 | Service et al.                   | 1999 | 5  |                                                                                                                                                                            | islet hypertrophy and nesidioblastosis                                                                                                | hyperinsulinemic hypoglycemia                     | partial pancreatectomy                                                                               |                                                                                                                                        |                      |
| 130 | Erquchi et al.                   | 1999 | 2  | 34- and 39-yr-old women, fainting, nausea, loss of consciousness                                                                                                           | graded slight hyperplasia of islets                                                                                                   | hyperinsulinemic hypoglycemia                     | distal pancreatectomy                                                                                |                                                                                                                                        |                      |
| 131 | Wängberg et al.                  | 1999 | 1  |                                                                                                                                                                            | nesidiodyplasia                                                                                                                       | hyperinsulinemic hypoglycemia                     | 95% distal pancreatectomy                                                                            | *                                                                                                                                      |                      |
| 132 | Tomaszewska et al.               | 1999 | 1  | 66-yr-old man; chronic alcohol-induced pancreatitis                                                                                                                        | nesidioblastosis                                                                                                                      | hyperinsulinemic hypoglycemia                     | subtotal pancreatectomy                                                                              | *                                                                                                                                      |                      |
| 133 | Park et al.                      | 1999 | ?  |                                                                                                                                                                            | nesidioblastosis                                                                                                                      | hyperinsulinemic hypoglycemia                     |                                                                                                      | unclear, if all adult*                                                                                                                 | Cited in Woo, 2015   |
|     |                                  |      |    | 72-yr-old woman; myelodysplasic syndrom; (diabetic) nodular glomerulosclerosis (no clinical history of diabetes mellitus)                                                  |                                                                                                                                       |                                                   |                                                                                                      | potential reversal of undiagnosed diabetes mellitus type II*                                                                           |                      |
| 134 | Yeh et al.                       | 1999 | 1  |                                                                                                                                                                            | nesidioblastosis                                                                                                                      | hyperinsulinemic hypoglycemia                     | post mortem analysis                                                                                 |                                                                                                                                        |                      |
| 135 | Hashimoto et al.                 | 1999 | 1  |                                                                                                                                                                            | nesidioblastosis                                                                                                                      | hyperinsulinemic hypoglycemia                     | distal pancreatectomy                                                                                |                                                                                                                                        |                      |
| 136 | Habane et al.                    | 1999 | ?  | large autopsy study                                                                                                                                                        | adult nesidioblastosis                                                                                                                |                                                   |                                                                                                      | unclear, how many (adult) cases*                                                                                                       |                      |
| 137 | Masayuki et al.                  | 1999 | 1  |                                                                                                                                                                            | nesidioblastosis                                                                                                                      |                                                   |                                                                                                      | Cited in Maeda, 2013*                                                                                                                  |                      |
|     |                                  |      |    | coexistence of islet cell adenomatosis; nesidioblastosis; hyperplasia of islets and type 2 diabetes                                                                        |                                                                                                                                       |                                                   |                                                                                                      |                                                                                                                                        |                      |
| 138 | Montreros et al.                 | 1999 | 1  |                                                                                                                                                                            | nesidioblastosis                                                                                                                      | hyperinsulinemic hypoglycemia                     |                                                                                                      | Cited in Wong, 2019*                                                                                                                   |                      |
| 139 | Thompson et al.                  | 2000 | 5  | all with severe postprandial hypoglycemia, 29-64-yr-old; 3x male, 2x female                                                                                                | islet cell hypertrophy/nesidioblastosis                                                                                               | hyperinsulinemic hypoglycemia                     | distal pancreatectomy                                                                                |                                                                                                                                        |                      |
| 140 | Kim et al.                       | 2000 | 1  | 72-yr-old man; several syncope                                                                                                                                             | diffuse islet cell hyperplasia without nesidioblastosis                                                                               | hyperinsulinemic hypoglycemia                     | partial pancreatectomy                                                                               |                                                                                                                                        |                      |
| 141 | van der Wal et al.               | 2000 | 2  | 16- and 55-yr-old women                                                                                                                                                    | focally increased islet tissue, hypertrophic beta cells                                                                               | hyperinsulinemic hypoglycemia                     | Whipple/distal pancreatectomy                                                                        |                                                                                                                                        |                      |
| 142 | White et al.                     | 2000 | 1  | concomitant pancreatic endocrine microadenoma                                                                                                                              | nesidioblastosis                                                                                                                      | hyperinsulinemic hypoglycemia                     |                                                                                                      | *                                                                                                                                      |                      |
| 143 | Kon et al.                       | 2000 | 1  | 57-yr-old woman; type 2 diabetes                                                                                                                                           | islet cell hyperplasia; nesidioblastosis                                                                                              | hyperinsulinemic hypoglycemia                     | 85% pancreatectomy                                                                                   | *                                                                                                                                      |                      |
|     |                                  |      |    | report of 65 patients, including 3 with nesidioblastosis, age 15-89 years of the total sample; 1 patient with concomitant insulinoma                                       |                                                                                                                                       |                                                   |                                                                                                      | 1 patient possibly insulinoma with background nesidioblastosis                                                                         |                      |
| 144 | Hellman et al.                   | 2000 | 3  |                                                                                                                                                                            | nesidioblastosis                                                                                                                      | hyperinsulinemic hypoglycemia                     | partial pancreatectomy                                                                               |                                                                                                                                        |                      |
| 145 | Culberson et al.                 | 2001 | ?  | large autopsy study with children and adults suffering from sickle cell disease                                                                                            | nesidioblastosis, islet cell dispersion/hyperplasia/hypertrophy                                                                       |                                                   |                                                                                                      | unclear, how many (adult) cases*                                                                                                       |                      |
| 146 | Zhao et al.                      | 2001 | 1  | functioning?) islet cell tumor                                                                                                                                             | nesidioblastosis                                                                                                                      | hyperinsulinemic hypoglycemia                     | distal pancreatectomy                                                                                |                                                                                                                                        |                      |
|     |                                  |      |    |                                                                                                                                                                            |                                                                                                                                       |                                                   |                                                                                                      |                                                                                                                                        |                      |
|     | Sumarac-Dumanovic et al.         | 2001 | 2  | 41-yr-old female; 53-yr-old female; both with positive fasting test                                                                                                        | islet cell hyperplasia and nesidioblastosis                                                                                           | hyperinsulinemic hypoglycemia                     | 70-75% distal pancreatectomy; one case with completion pancreatectomy                                |                                                                                                                                        |                      |
| 147 | al.                              |      |    |                                                                                                                                                                            |                                                                                                                                       |                                                   |                                                                                                      |                                                                                                                                        |                      |
| 148 | Burmeister et al.                | 2001 | ?  |                                                                                                                                                                            | nesidioblastosis                                                                                                                      |                                                   |                                                                                                      | *                                                                                                                                      | Cited in Jabri, 2004 |
|     |                                  |      |    |                                                                                                                                                                            |                                                                                                                                       |                                                   |                                                                                                      |                                                                                                                                        |                      |
|     |                                  |      |    |                                                                                                                                                                            |                                                                                                                                       |                                                   |                                                                                                      |                                                                                                                                        |                      |
| 149 | Witteles et al.                  | 2001 | 5  | 22- to 48-yr-old (3x women, 2x men)                                                                                                                                        | nesidioblastosis, hyperchromatic cell nuclei                                                                                          | hyperinsulinemic hypoglycemia                     | all 70% distal pancreatectomy; 2 patients need further treatment with Ca-channel blocker (Verapamil) |                                                                                                                                        |                      |
| 150 | Lecube et al.                    | 2001 | 1  | female                                                                                                                                                                     | nesidioblastosis                                                                                                                      | hyperinsulinemic hypoglycemia                     |                                                                                                      | *                                                                                                                                      |                      |
|     |                                  |      |    |                                                                                                                                                                            |                                                                                                                                       |                                                   |                                                                                                      |                                                                                                                                        |                      |
| 151 | Govindarajan et al.              | 2001 | 3  | study on fibrocalculus pancreatic diabetes, 21- to 50-yr-old                                                                                                               | nesidioblastosis; some with decrease in number of islets; some with signs of hyperplasia                                              |                                                   |                                                                                                      | "regenerative" type of nesidioblastosis as seen in cystic fibrosis/chronic pancreatitis? possibly secondary to the fibrocystic atrophy |                      |
| 152 | Meckler et al.                   | 2001 | 11 | family with fibrocystic pancreatic atrophy and pancreatic carcinoma                                                                                                        | endocrine cell hyperplasia; nesidioblastosis-like pattern                                                                             |                                                   | all total pancreatectomy                                                                             |                                                                                                                                        |                      |
|     |                                  |      |    |                                                                                                                                                                            |                                                                                                                                       |                                                   |                                                                                                      |                                                                                                                                        |                      |
|     | Espinosa-de-los-Montreros et al. | 2001 | 1  | Patient with FAP (familial adenomatous polyposis coli)                                                                                                                     | nesidioblastosis                                                                                                                      | hyperinsulinemic hypoglycemia                     | distal pancreatectomy                                                                                | *                                                                                                                                      |                      |
| 153 | Montreros et al.                 | 2001 | 1  | 42-yr-old woman; activating Glucokinase mutation                                                                                                                           |                                                                                                                                       | relative hyperinsulinemia                         |                                                                                                      |                                                                                                                                        |                      |
| 154 | Christesen et al.                | 2002 | 1  | 35-yr-old woman; had pancreas transplantation for diabetes mellitus type I;                                                                                                | nesidioblastosis; increased number of islets; nesidiodyplasia (large, hyperchromatic cell nuclei); scattered islet cell aggregates    | hyperinsulinemic hypoglycemia                     | complete allograft removal                                                                           |                                                                                                                                        |                      |
| 155 | Semakula et al.                  | 2002 | 1  | hyperprolactinemia                                                                                                                                                         | diffuse nesidioblastosis                                                                                                              | hypoglycemia                                      | partial pancreatectomy                                                                               | *                                                                                                                                      |                      |
| 156 | Matthews et al.                  | 2002 | 1  | concomitant insulinoma                                                                                                                                                     | nesidioblastosis                                                                                                                      | hyperinsulinemic hypoglycemia                     | partial pancreatectomy                                                                               |                                                                                                                                        |                      |
| 157 | Carneiro et al.                  | 2002 | 1  |                                                                                                                                                                            | nesidioblastosis                                                                                                                      |                                                   |                                                                                                      |                                                                                                                                        |                      |
| 158 | Casas Vara et al.                | 2002 | ?  |                                                                                                                                                                            | focal and diffuse nesidioblastosis                                                                                                    |                                                   |                                                                                                      | *                                                                                                                                      | Cited in Jabri, 2004 |
|     |                                  |      |    | hypopituitarism, secondary adrenal insufficiency; 84-yr-old woman; orbital lymphoma; fasting test negative                                                                 | nesidioblastosis                                                                                                                      | hyperinsulinemic hypoglycemia                     | 80% pancreatectomy                                                                                   | *                                                                                                                                      |                      |
| 159 | Lu et al.                        | 2002 | 1  | 20-yr-old woman (presenting with seizures); 1 adult man (Diagnosed after diagnosis of the son); both with proven activating glucokinase mutations                          | no nesidioblastosis in the woman; no histology available from the man                                                                 | hyperinsulinemic hypoglycemia (only in the woman) | pancreatic head resection + diazoxide (only the woman)                                               |                                                                                                                                        |                      |
| 160 | Gloyn et al.                     | 2003 | 2  |                                                                                                                                                                            |                                                                                                                                       |                                                   |                                                                                                      |                                                                                                                                        |                      |
|     |                                  |      |    | 4 female, 1 male; 29- to 59-yr-old; one patient with additional multiple small insulinomas                                                                                 |                                                                                                                                       |                                                   |                                                                                                      |                                                                                                                                        |                      |
| 161 | Kaczirek et al.                  | 2003 | 5  | (islet cell adenomatosis); case-series of 66 cases with adult organic hyperinsulinism                                                                                      | islet hypertrophy; pleomorphic β-cell nuclei, ductuloinsular complexes                                                                | hyperinsulinemic hypoglycemia                     | distal pancreatectomy                                                                                |                                                                                                                                        |                      |
| 162 | Vella et al.                     | 2003 | 8  | clinically defined Non-insulinoma pancreatogenous hypoglycemia                                                                                                             |                                                                                                                                       |                                                   |                                                                                                      | *                                                                                                                                      |                      |
| 163 | Branco et al.                    | 2003 | 1  | 29-yr-old, negative fasting test                                                                                                                                           | nesidioblastosis                                                                                                                      | hyperinsulinemic hypoglycemia                     | distal pancreatectomy                                                                                | *                                                                                                                                      |                      |
|     |                                  |      |    |                                                                                                                                                                            |                                                                                                                                       |                                                   |                                                                                                      |                                                                                                                                        |                      |
|     |                                  |      |    |                                                                                                                                                                            |                                                                                                                                       |                                                   |                                                                                                      |                                                                                                                                        |                      |
| 164 | Martignoni et al.                | 2003 | 1  | 54-yr-old man; oral antidiabetics for suspected diabetes mellitus type II                                                                                                  | Glucagon-reactive nesidioblastosis; increased islets; ductulo-insular complexes; A-cells also in the center of the islets; Ki-67 < 1% |                                                   | duodenopancreatectomy                                                                                | perhaps secondary hypoglycemia due to glycogen-storage depletion in response to hyperglucagonemia                                      |                      |
|     |                                  |      |    | 49-yr-old woman; hypertension, insulin-dependent diabetes mellitus, Hashimoto thyroiditis, chronic renal failure, renal stones; incidental left adrenal mass (adenoma);    |                                                                                                                                       |                                                   |                                                                                                      |                                                                                                                                        |                      |
| 165 | Giorgadze et al.                 | 2004 | 1  | ovarian thecal metaplasia                                                                                                                                                  | nesidiodyplasia in pancreas                                                                                                           | unclear                                           | resection                                                                                            | unclear significance of the (incidental) detection of nesidiodyplasia of the pancreas                                                  |                      |
| 166 | Ito et al.                       | 2004 | 1  | 84-yr-old woman; repeated unconsciousness                                                                                                                                  | islet cell hyperplasia                                                                                                                | hyperinsulinemic hypoglycemia                     | distal pancreatectomy (two step)                                                                     | *                                                                                                                                      |                      |
| 167 | Wiesli et al.                    | 2004 | 2  |                                                                                                                                                                            | islet cell hyperplasia                                                                                                                | hyperinsulinemic hypoglycemia                     |                                                                                                      | unclear, if all adult* (Journal: Clinical Endocrinology)                                                                               |                      |
|     |                                  |      |    |                                                                                                                                                                            |                                                                                                                                       |                                                   |                                                                                                      |                                                                                                                                        |                      |
| 168 | Wiesli et al.                    | 2004 | 2  |                                                                                                                                                                            | islet cell hyperplasia                                                                                                                | hyperinsulinemic hypoglycemia                     |                                                                                                      | unclear, if same patients as in Wiesli et al. 2004, Clinical Endocrinology); here: Journal of Vascular and Interventional Radiology    |                      |
| 169 | Proye et al.                     | 2004 | 2  | patients with MEN1; both with insulinoma                                                                                                                                   | nesidioblastosis                                                                                                                      | hyperinsulinemic hypoglycemia                     | resection                                                                                            |                                                                                                                                        |                      |
|     |                                  |      |    | series of 67 cases with adult hyperinsulinemic hypoglycemia; 4 matching the criteria of nesidioblastosis                                                                   |                                                                                                                                       |                                                   |                                                                                                      |                                                                                                                                        |                      |
| 170 | Kaczirek et al.                  | 2004 | 4  |                                                                                                                                                                            | nesidioblastosis                                                                                                                      | hyperinsulinemic hypoglycemia                     | resection                                                                                            | *                                                                                                                                      |                      |
|     |                                  |      |    | 36-yr-old woman; treated with octreotide through pregnancy; in course of pregnancy decrease in octreotide need (physiological insulin resistance despite hyperinsulinism); |                                                                                                                                       |                                                   |                                                                                                      |                                                                                                                                        |                      |
| 171 | Boulanger et al.                 | 2004 | 1  | normal infant                                                                                                                                                              | nesidioblastosis                                                                                                                      | hyperinsulinemic hypoglycemia                     | infusion of octreotide                                                                               | caesarean section; normal development of child without any signs of malformation                                                       |                      |
|     |                                  |      |    | 41-yr-old woman; von Hippel-Lindau disease; bilateral pheochromocytoma; renal cell carcinoma; multiple lesions in the pancreas with islet hyperplasia, microadenomas,      |                                                                                                                                       |                                                   |                                                                                                      |                                                                                                                                        |                      |
| 172 | Chetty et al.                    | 2004 | 1  | nesidioblastosis and an endocrine carcinoma                                                                                                                                |                                                                                                                                       |                                                   |                                                                                                      |                                                                                                                                        |                      |
|     |                                  |      |    | study of 232 patients with persistent hyperinsulinemic hypoglycemia; 15 with nesidioblastosis                                                                              | islet cell hyperplasia, nesidioblastosis                                                                                              | not symptomatic                                   | total pancreatectomy                                                                                 | potential overlap with MEN1?                                                                                                           |                      |
| 173 | Anlauf et al.                    | 2005 | 15 |                                                                                                                                                                            | nesidioblastosis; β-cell hypertrophy; enlarged and hyperchromatic β-cell nuclei                                                       | hyperinsulinemic hypoglycemia                     | surgery                                                                                              | *                                                                                                                                      |                      |

|     |                    |      |       |                                                                                                                                                                                                                                                                          |                                                                                                                                          |                                                                                                         |                                                                                               |                                                                                               |                              |
|-----|--------------------|------|-------|--------------------------------------------------------------------------------------------------------------------------------------------------------------------------------------------------------------------------------------------------------------------------|------------------------------------------------------------------------------------------------------------------------------------------|---------------------------------------------------------------------------------------------------------|-----------------------------------------------------------------------------------------------|-----------------------------------------------------------------------------------------------|------------------------------|
| 174 | Patti et al.       | 2005 | 3     | 27-66-yr-old; 2x female, 1x male; all with gastric bypass (2x Roux-en-Y; 1x vertical banded gastroplasty)                                                                                                                                                                | diffuse islet hyperplasia and increased beta cell mass                                                                                   | severe postprandial, hyperinsulinemic hypoglycemia unresponsive to dietary changes/octreotide/diazoxide | partial pancreatectomy                                                                        | to the best of our knowledge first definite report of post-bariatric surgery nesidioblastosis |                              |
| 175 | Pedrazzoli et al.  | 2005 | 4     |                                                                                                                                                                                                                                                                          | islet hyperplasia/nesidioblastosis                                                                                                       | hyperinsulinemic hypoglycemia                                                                           | partial pancreatectomy                                                                        | unclear, if all adult*                                                                        |                              |
| 176 | Service et al.     | 2005 | 13    | 5 women, 1 man; 39- to 54-yr-old; all had previous Roux-en-Y gastric bypass; 7 additional cases with adult nesidioblastosis without gastric bypass were diagnosed in the same institution during the reported period (rest reported in Service, 1999 and Thompson, 2000) | nesidioblastosis                                                                                                                         | hyperinsulinemic hypoglycemia                                                                           | partial pancreatectomy                                                                        | post-bariatric surgery nesidioblastosis                                                       |                              |
| 177 | Babinska et al.    | 2005 | 1     | 48-yr-old woman                                                                                                                                                                                                                                                          | nesidioblastosis                                                                                                                         | hyperinsulinemic hypoglycemia                                                                           | subtotal distal pancreatectomy + completion pancreatectomy                                    | *                                                                                             |                              |
| 178 | Chen et al.        | 2005 | 1     | 45-yr-old man; necrolytic migratory erythema; mild diabetes                                                                                                                                                                                                              | diffuse A cell hyperplasia                                                                                                               | mild diabetes                                                                                           |                                                                                               | *                                                                                             |                              |
| 179 | Tsujino et al.     | 2005 | 1     | 78-yr-old man; diagnosis with selective arterial calcium infusion                                                                                                                                                                                                        | nesidioblastosis, diffuse islet cell hyperplasia                                                                                         | hyperinsulinemic hypoglycemia                                                                           | 60% distal pancreatectomy                                                                     |                                                                                               |                              |
| 180 | Kondo et al.       | 2005 | 1     | 72-yr-old woman; unclear hyperinsulinism that persisted after partial pancreatectomy                                                                                                                                                                                     |                                                                                                                                          | hyperinsulinemic hypoglycemia                                                                           | partial pancreatectomy + additional treatment with long-acting somatostatin                   | unclear, if really nesidioblastosis                                                           |                              |
| 181 | Won et al.         | 2006 | 10    | 9x men, 1x woman; 29- to 78-yr-old; all with noninsulinoma pancreatogenous hypoglycemia with postprandial neuroglycopenia and negative fasting tests                                                                                                                     | abnormal expression of INGP (islet neogenesis associated protein)                                                                        | hyperinsulinemic hypoglycemia                                                                           | 6x distal pancreatic resection; 4x diazoxide treatment                                        |                                                                                               |                              |
| 182 | Diaz et al.        | 2006 | 1     | one of the patients had diabetes mellitus type II before; conversion to persistent hyperinsulinemic hypoglycemia (40-yr-old man)                                                                                                                                         | nesidioblastosis                                                                                                                         | hyperinsulinemic hypoglycemia                                                                           | surgery                                                                                       | *                                                                                             |                              |
| 183 | Raffel et al.      | 2006 | 4     | hyperinsulinemic hypoglycemia (40-yr-old man)                                                                                                                                                                                                                            | enlarged and hyperchromatic nuclei; enlarged islet; cytologic abnormalities only in B-cells                                              | hyperinsulinemic hypoglycemia                                                                           | surgery                                                                                       |                                                                                               |                              |
| 184 | Starke et al.      | 2006 | 11    | 18- to 66-yr-old; mostly non-obese (when compared to insulinoma); 9x female, 2x male                                                                                                                                                                                     | islet hyperplasia, hypertrophy, microadenomatosis                                                                                        | hyperinsulinemic hypoglycemia                                                                           | surgery                                                                                       |                                                                                               |                              |
| 185 | Meier et al.       | 2006 | 4     | all patients with gastrinoma/Zollinger-Ellison syndrome; 45- to 57-yr-old                                                                                                                                                                                                | fractional beta cell area, islet size and replication rate of beta cells was increased adjacent to the gastrinomas (but not > 1 cm away) |                                                                                                         | surgery                                                                                       |                                                                                               |                              |
| 186 | Wiesli et al.      | 2006 | 1 (2) | 2 women with HIV infection and narcotic addicts; no retroviral therapy                                                                                                                                                                                                   | nesidioblastosis (histologically confirmed only in 1 patient)                                                                            | hyperinsulinemic hypoglycemia                                                                           | distal pancreatectomy (one of the patients)                                                   | *                                                                                             |                              |
| 187 | Arao et al.        | 2006 | 1     | 54-yr-old man; impaired glucose tolerance; fasting hypoglycemia                                                                                                                                                                                                          | hypertrophy of islets; ductulo-insular complexes                                                                                         | hyperinsulinemic hypoglycemia                                                                           | subtotal pancreatectomy + subsequent diazoxide                                                |                                                                                               |                              |
| 188 | Clancy et al.      | 2006 | 2     | both post-gastric bypass patients                                                                                                                                                                                                                                        | nesidioblastosis                                                                                                                         | hyperinsulinemic hypoglycemia                                                                           | 95% pancreatectomy (1x) + total pancreatectomy (in two steps)                                 | post-bariatric surgery nesidioblastosis*                                                      |                              |
| 189 | Albazzaz et al.    | 2006 | 1     | 76-yr-old man; pseudo-obstruction of bowels; microadenomas pancreas most likely the same collective as reported by Raffel et al. 2006 (18 to 58-yr-old; 3x men, 4x woman)                                                                                                | islet cell hyperplasia (PP expressing cells)                                                                                             |                                                                                                         | duodenopancreatectomy                                                                         |                                                                                               |                              |
| 190 | Raffel et al.      | 2006 | 4     | 40-yr-old man; Billroth-II-Braun-gastroectomy approx. 4 years before symptom onset (+ Arnold-Chiari malformation, Klippel-Feil syndrome, recurrent duodenal ulcers)                                                                                                      | nesidioblastosis                                                                                                                         | hyperinsulinemic hypoglycemia                                                                           | distal pancreatectomy                                                                         |                                                                                               |                              |
| 191 | Nakagawa et al.    | 2007 | 1     | 34-yr-old woman; Roux-en-Y gastric bypass 12 months before symptom onset                                                                                                                                                                                                 | nesidioblastosis                                                                                                                         | hyperinsulinemic hypoglycemia                                                                           | distal pancreatectomy                                                                         | post-bariatric surgery nesidioblastosis                                                       |                              |
| 192 | Alvarez et al.     | 2007 | 1     | 54- to 78-yr-old (2x men, 3x women)                                                                                                                                                                                                                                      | nesidioblastosis                                                                                                                         | hyperinsulinemic hypoglycemia                                                                           | 40-70% distal pancreatectomy                                                                  | post-bariatric surgery nesidioblastosis                                                       |                              |
| 193 | Tseng et al.       | 2007 | 5     | 45- to 78-yr-old (2x men, 3x women)                                                                                                                                                                                                                                      | nesidioblastosis                                                                                                                         | hyperinsulinemic hypoglycemia                                                                           | diet modification                                                                             | possibly post-bariatric surgery nesidioblastosis                                              |                              |
| 194 | Bantle et al.      | 2007 | 3     | 1 women, 2 men; 50- to 65-yr-old; clinical diagnosis                                                                                                                                                                                                                     | increased number of islets + ectopic islets; proliferation of A, B, and D cells                                                          | hyperinsulinemic hypoglycemia                                                                           | 70% pancreatectomy                                                                            | *                                                                                             |                              |
| 195 | Sahloul et al.     | 2007 | 1     | 78-yr-old man                                                                                                                                                                                                                                                            | nesidioblastosis                                                                                                                         | hyperinsulinemic hypoglycemia                                                                           | distal pancreatectomy                                                                         |                                                                                               |                              |
| 196 | Costa et al.       | 2007 | 1     | 34-yr-old                                                                                                                                                                                                                                                                | nesidioblastosis                                                                                                                         | hyperinsulinemic hypoglycemia                                                                           | distal pancreatectomy + radiofrequency ablation of liver metastases                           | possibly insulinoma with background nesidioblastose                                           |                              |
| 197 | Rosman et al.      | 2007 | 1     | 34-yr-old man; metastatic insulinoma (11 years after enucleation of insulinoma; 5 years after distal pancreatectomy for nesidioblastosis)                                                                                                                                | nesidioblastosis                                                                                                                         | hyperinsulinemic hypoglycemia                                                                           | only abdominal pain                                                                           |                                                                                               |                              |
| 198 | Kok et al.         | 2007 | 1     | 24-yr-old woman with jejunal, heterotopic pancreas causing intussusception                                                                                                                                                                                               | nesidioblastosis                                                                                                                         | hyperinsulinemic hypoglycemia                                                                           | resection                                                                                     |                                                                                               |                              |
| 199 | Kaahinen et al.    | 2007 | 2     | 34-yr-old woman; 63-yr-old man                                                                                                                                                                                                                                           | nesidioblastosis (2x focal nesidioblastosis with corresponding uptake in 18F-DOPA PET)                                                   | hyperinsulinemic hypoglycemia                                                                           | subtotal pancreatectomy                                                                       |                                                                                               |                              |
| 200 | Vezosi et al.      | 2007 | 1     |                                                                                                                                                                                                                                                                          | nesidioblastosis                                                                                                                         | hyperinsulinemic hypoglycemia                                                                           | resection                                                                                     |                                                                                               |                              |
| 201 | Bunning et al.     | 2007 | 1     | 71-yr-old man                                                                                                                                                                                                                                                            | islet cell hyperplasia (PP expressing cells)                                                                                             |                                                                                                         | duodenopancreatectomy                                                                         |                                                                                               |                              |
| 202 | Hong et al.        | 2008 | 1     | 71-yr-old man; subtotal gastrectomy two years before symptom onset                                                                                                                                                                                                       | nesidioblastosis, hyperchromatic cell nuclei                                                                                             | hyperinsulinemic hypoglycemia                                                                           | distal pancreatectomy                                                                         | post-gastric surgery nesidioblastosis                                                         |                              |
| 203 | Yu et al.          | 2008 | 1     | 60-yr-old woman; nesidioblastosis, hyperplasia of A cells, microglucagonoma and 1 nonfunctioning islet cell tumor; concomitant meningioma                                                                                                                                | nesidioblastosis and hyperplasia of A cells                                                                                              | elevated glucagon, but now glucagonoma syndrome                                                         | resection (pylorus-sparing pancreaticoduodenectomy) + somatostatin analogues                  |                                                                                               |                              |
| 204 | Moreira et al.     | 2008 | 1     | 26-yr-old woman; Roux-en-Y bypass approx. 16 months before symptom onset; NIPHS suspected clinically; no fasting hypoglycemia but postprandial symptoms                                                                                                                  |                                                                                                                                          |                                                                                                         | Verapamil + Acarbose                                                                          | post-bariatric surgery nesidioblastosis                                                       |                              |
| 205 | Kovacs et al.      | 2008 | 2     | 34-yr-old female, 22-yr-old male; both with positive fasting test; nesidioblastosis suspected clinically                                                                                                                                                                 |                                                                                                                                          | hyperinsulinemic hypoglycemia                                                                           | Diazoxid                                                                                      | *                                                                                             |                              |
| 206 | Abellan et al.     | 2008 | 1     | 51-yr-old man; symptom onset 6 months after bariatric surgery; insulinoma in pancreatic tail                                                                                                                                                                             | nesidioblastosis with hypertrophy/hyperplasia of islets                                                                                  | hyperinsulinemic hypoglycemia                                                                           | resection                                                                                     | post-bariatric surgery nesidioblastosis                                                       |                              |
| 207 | Kellogg et al.     | 2008 | 12    | 12 patients from a cohort of 34 post-bypass surgery patients exhibited clinical symptoms of hypoglycemia and showed hyperinsulinemic hypoglycemia                                                                                                                        |                                                                                                                                          | hyperinsulinemic hypoglycemia                                                                           | Acarbose + low carbohydrate diet                                                              | post-bariatric surgery nesidioblastosis                                                       |                              |
| 208 | Dissanayake et al. | 2008 | 1     | 38-yr-old woman; psychotic behaviour; concomitant insulinoma                                                                                                                                                                                                             | nesidioblastosis                                                                                                                         | hyperinsulinemic hypoglycemia                                                                           | subtotal pancreatectomy                                                                       |                                                                                               |                              |
| 209 | Z'raggen et al.    | 2008 | 2     | cohort of 12 cases; 27- to 49-yr-old; 2 men, 10 women after Roux-en-Y bypass with severe hypoglycemia (insulin/C-Peptide not determined); clinical diagnosis                                                                                                             | nesidioblastosis confirmed in 2 cases pathologically                                                                                     |                                                                                                         | subtotal pancreatectomy in 2 cases; restoration of gastric restriction in the remaining cases | possibly post-bariatric surgery nesidioblastosis                                              |                              |
| 210 | Karawagh et al.    | 2008 | 1     |                                                                                                                                                                                                                                                                          | nesidioblastosis                                                                                                                         | hyperinsulinemic hypoglycemia                                                                           | distal pancreatectomy                                                                         | *                                                                                             |                              |
| 211 | Barbour et al.     | 2008 | 2     | after Roux-en-Y bypass                                                                                                                                                                                                                                                   | islet cell hyperplasia                                                                                                                   |                                                                                                         | surgery                                                                                       | post-bariatric surgery nesidioblastosis*                                                      |                              |
| 212 | Kenney et al.      | 2008 | 1     | 45-yr-old woman; oxydnone abuse; seizures                                                                                                                                                                                                                                | diffuse islet cell hyperplasia                                                                                                           | hyperinsulinemic hypoglycemia                                                                           | subtotal pancreatectomy                                                                       |                                                                                               |                              |
| 213 | Geraghty et al.    | 2008 | 1     | 50-yr-old man, morning sweats, tremor                                                                                                                                                                                                                                    | diffuse islet cell hyperplasia, nesidioblastosis                                                                                         | hyperinsulinemic hypoglycemia                                                                           | distal pancreatectomy                                                                         |                                                                                               |                              |
| 214 | Toyomasu et al.    | 2008 | 1     | 71-yr-old man; subtotal gastrectomy                                                                                                                                                                                                                                      | diffuse nesidioblastosis                                                                                                                 | hyperinsulinemic hypoglycemia                                                                           | distal pancreatectomy                                                                         | potentially not post-gastric surgery since no postprandial hypoglycemia                       |                              |
| 215 | Catton et al.      | 2008 | 1     | 66-yr-old man; hypoglycemia 2 years after esophagectomy; foreign-body granuloma above pancreatic tail                                                                                                                                                                    | islet cell hyperplasia; nesidioblastosis                                                                                                 | hyperinsulinemic hypoglycemia                                                                           | distal pancreatectomy                                                                         |                                                                                               |                              |
| 216 | Wig et al.         | 2008 | 1     | 20-yr-old man; recurrent abdominal pain; vomitins (since age of 5); chronic familial pancreatitis                                                                                                                                                                        | nesidioblastosis                                                                                                                         | hyperinsulinemic hypoglycemia                                                                           |                                                                                               | *                                                                                             |                              |
| 217 | Bright et al.      | 2008 | 1     | 35-yr-old female; positive fasting test; concomitant insulinoma                                                                                                                                                                                                          | nesidioblastosis                                                                                                                         | hyperinsulinemic hypoglycemia                                                                           | surgery                                                                                       |                                                                                               |                              |
| 218 | Restrepo et al.    | 2009 | ?     | concomitant insulinoma                                                                                                                                                                                                                                                   | nesidioblastosis                                                                                                                         |                                                                                                         |                                                                                               | *                                                                                             | Cited in Garcia-Santos, 2013 |
| 219 | Zhao et al.        | 2009 | 1     |                                                                                                                                                                                                                                                                          | islet cell hyperplasia                                                                                                                   | hyperinsulinemic hypoglycemia                                                                           | surgery                                                                                       | *                                                                                             |                              |
| 220 | Dong et al.        | 2009 | 1     | 84-yr-old male; diabetes mellitus type II (with insulin therapy); fasting hypoglycemia                                                                                                                                                                                   | islet cell hyperplasia, nesidioblastosis                                                                                                 | hyperinsulinemic hypoglycemia                                                                           | 70% distal pancreatectomy                                                                     | *                                                                                             |                              |
| 221 | Kaiser et al.      | 2009 | ?     | post-gastric bypass                                                                                                                                                                                                                                                      |                                                                                                                                          | hyperinsulinemic hypoglycemia                                                                           |                                                                                               | *                                                                                             |                              |
| 222 | Andronesi et al.   | 2009 | 2     | 29-yr-old woman; primigravida; gestational diabetes; hypoglycemia after delivery;                                                                                                                                                                                        | nesidioblastosis                                                                                                                         | hyperinsulinemic hypoglycemia                                                                           | resection                                                                                     | unclear, if adult*                                                                            |                              |
| 223 | Ahn et al.         | 2009 | 1     | diabetes after resection                                                                                                                                                                                                                                                 | nesidioblastosis                                                                                                                         | hyperinsulinemic hypoglycemia                                                                           | 95% pancreatectomy                                                                            |                                                                                               |                              |
| 224 | Toyomasu et al.    | 2009 | 1     | 82-yr-old man; hypoglycemic syncope in the early morning                                                                                                                                                                                                                 | diffuse nesidioblastosis                                                                                                                 | hyperinsulinemic hypoglycemia                                                                           | distal pancreatectomy                                                                         | *                                                                                             |                              |
| 225 | Rumilla et al.     | 2009 | >=23  | 27 cases of post-bariatric bypass nesidioblastosis (25 women; 2 men); 9 cases of idiopathic nesidioblastosis in adults (3 women, 6 men); subset already reported in Service, 2005                                                                                        | nesidioblastosis; 50% associated with peliosis-like vascular ectasia                                                                     | hyperinsulinemic hypoglycemia                                                                           | distal pancreatectomy                                                                         |                                                                                               |                              |
| 226 | Francesconi et al. | 2009 | 1     | 60-yr-old man; fecal urgency, diarrhea; focal uptake in 111In-Pentetreotide scan                                                                                                                                                                                         | nesidioblastosis                                                                                                                         | no signs of hyperinsulinism                                                                             | Whipple's procedure                                                                           | unclear, if occult VIPoma                                                                     |                              |
| 227 | Thaler et al.      | 2009 | 135   | discussion of approx. 135 cases of post-bariatric surgery (Roux-en-Y) hyperinsulinemic hypoglycemia on a conference; unclear, how many of them have been reported before                                                                                                 | nesidioblastosis                                                                                                                         |                                                                                                         | some with distal pancreatectomy                                                               | unclear, which cases have been reported before                                                |                              |
| 228 | Henegop et al.     | 2009 | 4     | 25- to 44-yr-old (2x men, 2x women); no association with VHL and MEN1                                                                                                                                                                                                    | islet cell hyperplasia (A cell excess)                                                                                                   |                                                                                                         | autopsy/pancreatic resection                                                                  |                                                                                               |                              |
| 229 | Spanakis et al.    | 2009 | 1     | 52-yr-old woman; post-gastric bypass; clinical diagnosis                                                                                                                                                                                                                 |                                                                                                                                          | hyperinsulinemic hypoglycemia                                                                           | diazoxide                                                                                     | possibly post-bariatric surgery nesidioblastosis                                              |                              |
| 230 | Aasheim et al.     | 2009 | 1     | 41-yr-old woman; after duodenal switch                                                                                                                                                                                                                                   |                                                                                                                                          | hyperinsulinemic hypoglycemia                                                                           |                                                                                               | possibly post-bariatric surgery nesidioblastosis*                                             |                              |

|     |                          |      |    |                                                                                                                                                                                                                                                           |                                                                                                                                                                                                                                                                                                                                                                         |                               |                                                                       |                                                                                                                |                              |
|-----|--------------------------|------|----|-----------------------------------------------------------------------------------------------------------------------------------------------------------------------------------------------------------------------------------------------------------|-------------------------------------------------------------------------------------------------------------------------------------------------------------------------------------------------------------------------------------------------------------------------------------------------------------------------------------------------------------------------|-------------------------------|-----------------------------------------------------------------------|----------------------------------------------------------------------------------------------------------------|------------------------------|
| 231 | Halperin et al.          | 2010 | 1  | 59-yr-old woman; Roux-en-Y bypass                                                                                                                                                                                                                         |                                                                                                                                                                                                                                                                                                                                                                         | hyperinsulinemic hypoglycemia | glucagon                                                              | possibly post-bariatric surgery nesidioblastosis                                                               |                              |
| 232 | Mengual et al.           | 2010 | ?  |                                                                                                                                                                                                                                                           | nesidioblastosis                                                                                                                                                                                                                                                                                                                                                        |                               |                                                                       | *                                                                                                              | Cited in García-Santos, 2013 |
| 233 | Guseva et al.            | 2010 | 1  | 65-yr-old woman; post-gastric bypass surgery (26 years earlier); postprandial hypoglycemia; intraductal papillary mucinous tumor (stable); selective arterial calcium stimulation suggestive of nesidioblastosis                                          | only clinical                                                                                                                                                                                                                                                                                                                                                           | hyperinsulinemic hypoglycemia | nifedipine treatment (30 mg/day)                                      | post-bariatric surgery nesidioblastosis                                                                        |                              |
| 234 | Moreno Moreno et al.     | 2010 | 3  |                                                                                                                                                                                                                                                           | nesidioblastosis                                                                                                                                                                                                                                                                                                                                                        | hyperinsulinemic hypoglycemia | surgery                                                               | unclear, if adult*                                                                                             |                              |
| 235 | Gorsetski et al.         | 2010 | 16 | noninsulinoma pancreatogenous hypoglycemia syndrome                                                                                                                                                                                                       | nesidioblastosis                                                                                                                                                                                                                                                                                                                                                        | hyperinsulinemic hypoglycemia | surgery                                                               | unclear, how many reported before by the authors                                                               |                              |
| 236 | Ballester et al.         | 2010 | 1  | female                                                                                                                                                                                                                                                    | nesidioblastosis                                                                                                                                                                                                                                                                                                                                                        | hyperinsulinemic hypoglycemia |                                                                       | *                                                                                                              |                              |
| 237 | Bränström et al.         | 2010 | 1  | 35-yr-old man; electrophysiological studies                                                                                                                                                                                                               | nesidioblastosis                                                                                                                                                                                                                                                                                                                                                        | hyperinsulinemic hypoglycemia | 80% pancreatectomy                                                    |                                                                                                                |                              |
| 238 | McElroy et al.           | 2010 | 1  | 44-yr-old man                                                                                                                                                                                                                                             | focal nesidioblastosis (nesidioblastoma); exophytic lesion; variably enlarged islets; clear cytoplasm, anisonucleosis; hyperchromatic nuclei; prominent nucleoli; larger islets + higher islet density; 8-cells according to immunohistochemistry; no increased Ki-67 positivity; distribution of somatostatin, glucagon and pancreatic polypeptide similar to controls | hyperinsulinemic hypoglycemia | enucleation (less than 5% of pancreas)                                |                                                                                                                |                              |
| 239 | Kibebew et al.           | 2010 | 1  |                                                                                                                                                                                                                                                           | nesidioblastosis                                                                                                                                                                                                                                                                                                                                                        | hyperinsulinemic hypoglycemia | partial pancreatectomy                                                | unclear, if really adult*                                                                                      |                              |
| 240 | Mathavan et al.          | 2010 | 1  | post-gastric bypass patients; 28- to 62-yr-old; 8x women; 1x male; symptom onset 1 to 56 months after bypass surgery                                                                                                                                      | compatible with nesidioblastosis                                                                                                                                                                                                                                                                                                                                        | hyperinsulinemic hypoglycemia | extended distal pancreatectomy                                        | post-bariatric surgery nesidioblastosis                                                                        |                              |
| 241 | Reubi et al.             | 2010 | 7  | study on GLP-1 expression in tissue samples from 7 patients with post-gastric bypass (all Roux-en-Y) hyperinsulinemic hypoglycemia; 28- 69-yr-old; 6x women, 1x men                                                                                       | compatible with nesidioblastosis                                                                                                                                                                                                                                                                                                                                        | hyperinsulinemic hypoglycemia | partial pancreatectomy                                                | post-bariatric surgery nesidioblastosis                                                                        |                              |
| 242 | Vanderveen et al.        | 2010 | 75 | completed survey (13 men, 35 women; 15- to 78-yr-old); non-respondents (21; 28- to 63-yr-old; 6 men, 15 women) + 5 deaths + 1 in prison; from 75: 48 had prior bariatric surgery; some also gastrectomy/esophagectomy/anti-ulcer or anti-reflux procedure | nesidioblastosis/islet cell hyperplasia                                                                                                                                                                                                                                                                                                                                 | hyperinsulinemic hypoglycemia | mostly distal pancreatectomy                                          | many post-bariatric surgery patients; unclear, if any of the cases have been reported before in the literature |                              |
| 243 | Bernard et al.           | 2010 | 1  | 69-yr-old man; prior fundoplication surgery; presents with postprandial hypoglycemia and 1 positive selective arterial calcium stimulation; declined surgery                                                                                              |                                                                                                                                                                                                                                                                                                                                                                         | hyperinsulinemic hypoglycemia | octreotide treatment                                                  | possibly case of post-surgery nesidioblastosis                                                                 |                              |
| 244 | Rabiee et al.            | 2011 | 1  | 47-yr-old woman, post-gastric bypass                                                                                                                                                                                                                      | nesidioblastosis/islet cell hyperplasia                                                                                                                                                                                                                                                                                                                                 | hyperinsulinemic hypoglycemia | 85% pancreatectomy                                                    | post-gastric surgery nesidioblastosis                                                                          |                              |
| 245 | Arafah et al.            | 2011 | 1  | 16-yr-old female; concomitant pseudopapillary neoplasm of the pancreas                                                                                                                                                                                    | islet cell hyperplasia                                                                                                                                                                                                                                                                                                                                                  | hypoglycemia                  | distal pancreatectomy                                                 | *                                                                                                              |                              |
| 246 | Nayak et al.             | 2011 | 1  | 45-yr-old woman; lesion in the uncinata process                                                                                                                                                                                                           | focal islet cell hyperplasia                                                                                                                                                                                                                                                                                                                                            | hyperinsulinemic hypoglycemia | enucleation                                                           |                                                                                                                |                              |
| 247 | Batra et al.             | 2011 | 1  | 55-yr-old woman; symptoms not related to fasting                                                                                                                                                                                                          | nesidioblastosis                                                                                                                                                                                                                                                                                                                                                        | hyperinsulinemic hypoglycemia | distal pancreatectomy                                                 | *                                                                                                              |                              |
| 248 | Otto et al.              | 2011 | 1  | 44-yr-old man; glucagonoma syndrome                                                                                                                                                                                                                       | diffuse A cell hyperplasia                                                                                                                                                                                                                                                                                                                                              |                               | octreotide treatment                                                  |                                                                                                                |                              |
| 249 | Azemoto et al.           | 2012 | 1  | 59-yr-old woman; no glucagonoma syndrome                                                                                                                                                                                                                  | A cell hyperplasia                                                                                                                                                                                                                                                                                                                                                      |                               | distal pancreatectomy                                                 |                                                                                                                |                              |
| 250 | Roberts et al.           | 2012 | 1  | 56-yr-old male; glucagonoma with GLP-1 secretion (metastatic); first diabetes, later hypoglycemia                                                                                                                                                         |                                                                                                                                                                                                                                                                                                                                                                         | hyperinsulinemic hypoglycemia | surgery                                                               |                                                                                                                |                              |
| 251 | Qntar et al.             | 2012 | 1  | 40-yr-old female; Roux-en-Y bypass 6 years before presentation                                                                                                                                                                                            | diffuse islet cell hypertrophy, pleomorphism, ductulo-insular complexes                                                                                                                                                                                                                                                                                                 | hyperinsulinemic hypoglycemia | 80% pancreatectomy                                                    | post-bariatric surgery nesidioblastosis                                                                        |                              |
| 252 | Limongelli et al.        | 2012 | 1  | 37-yr-old woman; morbidly obese                                                                                                                                                                                                                           | islet cell hyperplasia                                                                                                                                                                                                                                                                                                                                                  | hyperinsulinemic hypoglycemia | distal pancreatectomy                                                 |                                                                                                                |                              |
| 253 | De Heide et al.          | 2012 | 1  | 25-yr-old woman; post-Roux-en-Y bypass; clinical diagnosis of hyperinsulinemic hypoglycemia                                                                                                                                                               |                                                                                                                                                                                                                                                                                                                                                                         | hyperinsulinemic hypoglycemia | laparoscopic adjustable banding for pouch dilatation                  | possibly post-bariatric surgery nesidioblastosis                                                               |                              |
| 254 | Myint et al.             | 2012 | 1  | 42-yr-old woman; 6 years after gastric bypass surgery                                                                                                                                                                                                     |                                                                                                                                                                                                                                                                                                                                                                         | hyperinsulinemic hypoglycemia | octreotide treatment                                                  | possibly post-bariatric surgery nesidioblastosis                                                               |                              |
| 255 | Nadelson et al.          | 2012 | 1  | 51-yr-old woman after Roux-en-Y gastric bypass (multiple revisions; gastrectomy)                                                                                                                                                                          |                                                                                                                                                                                                                                                                                                                                                                         | hyperinsulinemic hypoglycemia | acarbose                                                              | possibly post-bariatric surgery nesidioblastosis                                                               |                              |
| 256 | Przybylik-Mazurek et al. | 2012 | 5  | adult; 3 with concomitant small insulinomas                                                                                                                                                                                                               | islet cell hyperplasia                                                                                                                                                                                                                                                                                                                                                  | hyperinsulinemic hypoglycemia | distal pancreatectomy                                                 | *                                                                                                              |                              |
| 257 | Ceppa et al.             | 2012 | ?  | Post-gastric-bypass                                                                                                                                                                                                                                       | nesidioblastosis                                                                                                                                                                                                                                                                                                                                                        | hyperinsulinemic hypoglycemia | duodenopancreatectomy + Diazoxide                                     | *                                                                                                              |                              |
| 258 | Ferrario et al.          | 2012 | 1  | 23-yr-old man                                                                                                                                                                                                                                             | nesidioblastosis                                                                                                                                                                                                                                                                                                                                                        | hyperinsulinemic hypoglycemia | bypass reversal                                                       | possibly post bariatric surgery nesidioblastosis                                                               |                              |
| 259 | Lee et al.               | 2013 | 2  | 35- and 62-yr-old women after Roux-en-Y bypass; clinical diagnosis                                                                                                                                                                                        |                                                                                                                                                                                                                                                                                                                                                                         | hyperinsulinemic hypoglycemia |                                                                       |                                                                                                                |                              |
| 260 | Christ et al.            | 2013 | 3  | Detection via 111In-DTPA-exendin-4 SPECT/CT (2x false positive, 1x true negative); study on insulinoma detection                                                                                                                                          | islet cell hyperplasia                                                                                                                                                                                                                                                                                                                                                  | hyperinsulinemic hypoglycemia | surgery                                                               |                                                                                                                |                              |
| 261 | Soares et al.            | 2013 | 1  | 22-yr-old woman; obese, hypertensive; recurrent transient loss of consciousness (no relation to fasting); sinus tachycardia during events                                                                                                                 | islet cell hyperplasia and hypertrophy; ductulo-insular complexes; nesidioblastosis                                                                                                                                                                                                                                                                                     | hyperinsulinemic hypoglycemia | total pancreatectomy (recurrent symptoms after distal pancreatectomy) |                                                                                                                |                              |
| 262 | García-Santos et al.     | 2013 | 1  | 38-yr-old woman (previous duodenal ulcers with pyloroplasty and truncal vagotomy); later antrectomy + Roux-en-Y procedure                                                                                                                                 | nesidioblastosis                                                                                                                                                                                                                                                                                                                                                        | hyperinsulinemic hypoglycemia | 80% pancreatectomy                                                    |                                                                                                                |                              |
| 263 | Then et al.              | 2013 | 1  | 58-yr-old woman                                                                                                                                                                                                                                           | islet cell hyperplasia                                                                                                                                                                                                                                                                                                                                                  | hyperinsulinemic hypoglycemia | repeated pancreatic resections up to total pancreatectomy             |                                                                                                                |                              |
| 264 | Al-Sarireh et al.        | 2013 | 1  | 56-yr-old man; renal cell carcinoma; cystic lesion in pancreas                                                                                                                                                                                            | islet cell hyperplasia (A cell excess)                                                                                                                                                                                                                                                                                                                                  |                               | resection                                                             |                                                                                                                |                              |
| 265 | Choi et al.              | 2013 | 1  | 43-yr-old woman; concomitant non-functioning pancreatic neuroendocrine tumor; type II diabetes                                                                                                                                                            | islet cell hyperplasia; hyperchromatic nuclei and pleomorphism, diffuse nesidioblastosis                                                                                                                                                                                                                                                                                | hyperglycemia                 | duodenopancreatectomy                                                 |                                                                                                                |                              |
| 266 | Gupta et al.             | 2013 | 1  | 50-yr-old woman                                                                                                                                                                                                                                           | nesidioblastosis                                                                                                                                                                                                                                                                                                                                                        | hyperinsulinemic hypoglycemia | subtotal pancreatectomy                                               |                                                                                                                |                              |
| 267 | Sowa-Staszczak et al.    | 2013 | 1  | 38-yr-old woman; concomitant insulinoma                                                                                                                                                                                                                   | nesidioblastosis                                                                                                                                                                                                                                                                                                                                                        | hyperinsulinemic hypoglycemia | multiple pancreatic operations                                        |                                                                                                                |                              |
| 268 | Pongpasobchai et al.     | 2013 | 2  |                                                                                                                                                                                                                                                           | nesidioblastosis                                                                                                                                                                                                                                                                                                                                                        | hyperinsulinemic hypoglycemia |                                                                       | unclear, if adult*                                                                                             |                              |
| 269 | Maeda et al.             | 2013 | 1  | 32-yr-old man                                                                                                                                                                                                                                             | nesidioblastosis                                                                                                                                                                                                                                                                                                                                                        | hyperinsulinemic hypoglycemia | distal pancreatectomy                                                 |                                                                                                                |                              |
| 270 | Grönberg et al.          | 2013 | 1  |                                                                                                                                                                                                                                                           | nesidioblastosis                                                                                                                                                                                                                                                                                                                                                        |                               |                                                                       | unclear if adult                                                                                               |                              |
| 271 | Challis et al.           | 2014 | 5  | family with hyperinsulinemic hypoglycemia, all adult; activating GCK (Glukokinase) mutations, 33- to 84-yr-old                                                                                                                                            | not available                                                                                                                                                                                                                                                                                                                                                           | hyperinsulinemic hypoglycemia | diazoxide/diet                                                        |                                                                                                                |                              |
| 272 | De Heide et al.          | 2014 | 1  | post Roux-en-Y bypass                                                                                                                                                                                                                                     |                                                                                                                                                                                                                                                                                                                                                                         | hyperinsulinemic hypoglycemia | pasireotide                                                           | Cited in Schwartz, 2016*; possibly post-bariatric surgery nesidioblastosis                                     |                              |
| 273 | Campos et al.            | 2014 | 5  | all post Roux-en-Y bypass; clinical hyperinsulinemic hypoglycemia; 38- to 49-yr-old; 4x women, 1x man                                                                                                                                                     |                                                                                                                                                                                                                                                                                                                                                                         | hyperinsulinemic hypoglycemia | bypass reversal (normal anatomy or modified sleeve gastrectomy)       |                                                                                                                |                              |
| 274 | Kang et al.              | 2014 | 1  | 35-yr-old female; recurrent acute pancreatitis; glucagonoma; glucagon-producing microadenoma                                                                                                                                                              | diffuse hyperplasia of islets (A cells); alpha-cell nesidioblastosis                                                                                                                                                                                                                                                                                                    |                               | distal pancreatectomy                                                 | *                                                                                                              |                              |
| 275 | Pathak et al.            | 2014 | 1  | 47-yr-old woman, type II diabetes, hypertension; Roux-en-Y bypass before; postprandial hypoglycemia                                                                                                                                                       | nesidioblastosis                                                                                                                                                                                                                                                                                                                                                        | hyperinsulinemic hypoglycemia | distal pancreatectomy                                                 | post-gastric surgery nesidioblastosis                                                                          |                              |
| 276 | Rao et al.               | 2014 | 1  | 58-yr-old man; Roux-en-Y bypass nine months before symptoms                                                                                                                                                                                               |                                                                                                                                                                                                                                                                                                                                                                         | hyperinsulinemic hypoglycemia | bypass reversal                                                       |                                                                                                                |                              |
| 277 | de Santibanes et al.     | 2014 | 3  |                                                                                                                                                                                                                                                           | nesidioblastosis                                                                                                                                                                                                                                                                                                                                                        | hyperinsulinemic hypoglycemia | distal pancreatectomy                                                 | *                                                                                                              |                              |
| 278 | García et al.            | 2014 | 2  | 2x women (36-yr-old), post-gastric bypass                                                                                                                                                                                                                 | islet cell hyperplasia                                                                                                                                                                                                                                                                                                                                                  | hyperinsulinemic hypoglycemia | distal pancreatectomy                                                 | post-bariatric surgery nesidioblastosis                                                                        |                              |
| 279 | Woo et al.               | 2015 | 5  | 5 women; 48- to 86-yr-old; no history of gastric bypass; one patient had concomitant insulin autoantibodies                                                                                                                                               | nesidioblastosis                                                                                                                                                                                                                                                                                                                                                        | hyperinsulinemic hypoglycemia | distal to subtotal pancreatectomy                                     |                                                                                                                |                              |
| 280 | Martin-Grace et al.      | 2015 | 1  | 28-yr-old woman, exercise-induced hypoglycemia                                                                                                                                                                                                            | islet cell hyperplasia, nesidioblastosis                                                                                                                                                                                                                                                                                                                                | hyperinsulinemic hypoglycemia | distal pancreatectomy + amlodipine                                    |                                                                                                                |                              |
| 281 | Valli et al.             | 2015 | 1  | 59-yr-old woman; small neuroendocrine tumor in pancreatic tail (non-functioning)                                                                                                                                                                          | nesidioblastosis                                                                                                                                                                                                                                                                                                                                                        | hyperinsulinemic hypoglycemia | distal pancreatectomy + amlodipine                                    |                                                                                                                |                              |
| 282 | Ramirez-Gonzalez et al.  | 2015 | 1  | 46-yr-old woman; Sheehan syndrome                                                                                                                                                                                                                         | islet hyperplasia, diffuse nesidioblastosis                                                                                                                                                                                                                                                                                                                             | hyperinsulinemic hypoglycemia | distal pancreatectomy                                                 |                                                                                                                |                              |
| 283 | Thompson et al.          | 2015 | 74 | cohort has been reported before in Vanderveen, 2010 (see above)                                                                                                                                                                                           | nesidioblastosis/islet cell hyperplasia                                                                                                                                                                                                                                                                                                                                 | hyperinsulinemic hypoglycemia | distal pancreatectomy                                                 |                                                                                                                |                              |
| 284 | Maguine et al.           | 2015 | 1  | 34-yr-old man; concomitant neuroendocrine tumor                                                                                                                                                                                                           | background islet cell microadenomatosis                                                                                                                                                                                                                                                                                                                                 | hyperinsulinemic hypoglycemia | distal pancreatectomy                                                 |                                                                                                                |                              |
| 285 | Unal et al.              | 2015 | 1  | 33-yr-old woman, history of gastric bypass surgery                                                                                                                                                                                                        | nesidioblastosis                                                                                                                                                                                                                                                                                                                                                        | hyperinsulinemic hypoglycemia | distal pancreatectomy                                                 |                                                                                                                |                              |
| 286 | Fountoulakis et al.      | 2015 | 1  | 43-yr-old woman; disturbed counterregulatory hormone responses (impaired cortisol response); clinical diagnosis                                                                                                                                           |                                                                                                                                                                                                                                                                                                                                                                         | hyperinsulinemic hypoglycemia | diazoxide                                                             |                                                                                                                |                              |

|     |                             |      |                                                                                                                                                                                                                                                                                                                         |   |                                                                                                          |                                                               |                                                                                                                           |                                                                                              |  |
|-----|-----------------------------|------|-------------------------------------------------------------------------------------------------------------------------------------------------------------------------------------------------------------------------------------------------------------------------------------------------------------------------|---|----------------------------------------------------------------------------------------------------------|---------------------------------------------------------------|---------------------------------------------------------------------------------------------------------------------------|----------------------------------------------------------------------------------------------|--|
| 287 | Qin et al.                  | 2015 | 1 62-yr-old man                                                                                                                                                                                                                                                                                                         |   | focal, adult nesidioblastosis                                                                            | hyperinsulinemic hypoglycemia                                 | enucleation                                                                                                               |                                                                                              |  |
| 288 | Sampaio-Neto et al.         | 2015 | 3 32- to 43-yr-old women; post-gastric bypass patients, clinical diagnosis                                                                                                                                                                                                                                              |   |                                                                                                          | hyperinsulinemic hypoglycemia                                 | bypass reversal                                                                                                           |                                                                                              |  |
| 289 | Christ et al.               | 2015 | 1 65-yr-old woman (negative 18F-DOPA-PET/CT; 68Ga-DOTATATE-PET/CT and arterial calcium stimulation); diffuse uptake in 68Ga-DOTA-exendin-4 PET/CT                                                                                                                                                                       |   | nesidioblastosis                                                                                         | hyperinsulinemic hypoglycemia                                 | distal pancreatectomy                                                                                                     |                                                                                              |  |
| 290 | Mordes et al.               | 2015 | 6 all patients after Roux-en-Y bypass; age 13- to 57-yr-old; clinical diagnoses                                                                                                                                                                                                                                         |   |                                                                                                          | hyperinsulinemic hypoglycemia                                 | diet/acarbose/calcium channel inhibitor; no pancreatectomy                                                                | possibly post-bariatric surgery nesidioblastosis                                             |  |
| 291 | Mihai et al.                | 2015 | 1 57-yr-old                                                                                                                                                                                                                                                                                                             |   | nesidioblastosis; isolated cells and areas of focal distribution                                         | hyperinsulinemic hypoglycemia                                 | distal pancreatectomy                                                                                                     |                                                                                              |  |
| 292 | Macedo et al.               | 2016 | 1 34-yr-old woman; post-Roux-en-Y bypass                                                                                                                                                                                                                                                                                |   | nesidioblastosis                                                                                         | hyperinsulinemic hypoglycemia                                 | subtotal pancreatectomy + bypass reversal to sleeve gastrectomy                                                           |                                                                                              |  |
| 293 | Kim et al.                  | 2016 | 1 54-yr-old woman                                                                                                                                                                                                                                                                                                       |   | focal hyperplasia/focal nesidioblastosis; nuclear hyperchromasia                                         | hyperinsulinemic hypoglycemia                                 | pylorus-preserving pancreatoduodenectomy                                                                                  | focal nesidioblastosis                                                                       |  |
| 294 | Yang et al.                 | 2016 | 1 29-yr-old female                                                                                                                                                                                                                                                                                                      |   | nesidioblastosis                                                                                         | hyperinsulinemic hypoglycemia                                 | distal pancreatectomy                                                                                                     |                                                                                              |  |
| 295 | Luo et al.                  | 2016 | 4 clinical diagnosis; 2 at school age with proven activating mutations of glucokinase                                                                                                                                                                                                                                   |   |                                                                                                          | hyperinsulinemic hypoglycemia                                 |                                                                                                                           | definite age unknown                                                                         |  |
| 296 | Schwetz et al.              | 2016 | 1 46-yr-old female; no hyperglucagonemia                                                                                                                                                                                                                                                                                |   | islet cell hyperplasia; microadenoma with glucagon expression                                            | hyperinsulinemic hypoglycemia                                 | distal pancreatectomy + pasireotide                                                                                       |                                                                                              |  |
| 297 | Prasad et al.               | 2016 | 3 3x women; 61- to 67-yr-old                                                                                                                                                                                                                                                                                            |   | nesidioblastosis                                                                                         | hyperinsulinemic hypoglycemia                                 | distal pancreatectomy or Lanreotide                                                                                       |                                                                                              |  |
| 298 | Krieger et al.              | 2016 | 5 2 cases with insulinoma + nesidioblastosis, 3 cases with nesidioblastosis alone                                                                                                                                                                                                                                       |   | nesidioblastosis                                                                                         | hyperinsulinemic hypoglycemia                                 | surgery                                                                                                                   | unclear, if all adult*                                                                       |  |
| 299 | Villarsa et al.             | 2016 | 2 post-gastric bypass surgery patients                                                                                                                                                                                                                                                                                  |   | nesidioblastosis                                                                                         | hyperinsulinemic hypoglycemia                                 | partial pancreatectomy                                                                                                    | post-bariatric surgery nesidioblastosis                                                      |  |
| 300 | Sowa-Staszczak et al.       | 2016 | 4 2x combination of insulinoma with nesidioblastosis, 2x nesidioblastosis alone                                                                                                                                                                                                                                         |   | nesidioblastosis                                                                                         | hyperinsulinemic hypoglycemia                                 | distal pancreatectomy                                                                                                     |                                                                                              |  |
| 301 | Gunnarsdottir et al.        | 2016 | 1 18-yr-old woman                                                                                                                                                                                                                                                                                                       |   | nesidioblastosis                                                                                         | hyperinsulinemic hypoglycemia                                 |                                                                                                                           |                                                                                              |  |
| 302 | De Sousa et al.             | 2016 | 1 33-yr-old man; concomitant pancreatic neuroendocrine tumor (microadenoma), intraductal papillary mucinous neoplasia                                                                                                                                                                                                   |   | nesidioblastosis (A and B cell hyperplasia)                                                              | hyperinsulinemic hypoglycemia (no clinics of glucagon excess) | subtotal pancreatectomy                                                                                                   |                                                                                              |  |
| 303 | Anderson et al.             | 2016 | 1 67-yr-old man; COPD, hypertension, bradycardia (with transient complete heart block), alcohol abuse (Wernicke-Korsakoff syndrome)                                                                                                                                                                                     |   | nesidioblastosis/islet cell hyperplasia                                                                  | hyperinsulinemic hypoglycemia                                 | distal pancreatectomy + diazoxide and acarbose                                                                            |                                                                                              |  |
| 304 | Preechakul et al.           | 2016 | 1                                                                                                                                                                                                                                                                                                                       |   | nesidioblastosis                                                                                         | hyperinsulinemic hypoglycemia                                 |                                                                                                                           | *                                                                                            |  |
| 305 | Chen et al.                 | 2018 | 1 34-yr-old woman; post-Roux-en-Y bypass                                                                                                                                                                                                                                                                                |   | nesidioblastosis; islet cell hyperplasia                                                                 | hyperinsulinemic hypoglycemia                                 | bypass reversal; 80% pancreatectomy (conservative treatment with diazoxide/octreotide/dietary modifications unsuccessful) | post-bariatric surgery nesidioblastosis                                                      |  |
| 306 | Dadheech et al.             | 2018 | 1 28-yr-old male; post-Roux-en-Y bypass                                                                                                                                                                                                                                                                                 |   | nesidioblastosis; islet cell hyperplasia and significant proliferation                                   | hyperinsulinemic hypoglycemia                                 | distal pancreatectomy                                                                                                     | post-bariatric surgery nesidioblastosis                                                      |  |
| 307 | Antwi et al.                | 2018 | 1                                                                                                                                                                                                                                                                                                                       |   | nesidioblastosis (focal)                                                                                 | hyperinsulinemic hypoglycemia                                 | surgery                                                                                                                   |                                                                                              |  |
| 308 | Luca et al.                 | 2018 |                                                                                                                                                                                                                                                                                                                         |   | nesidioblastosis                                                                                         |                                                               |                                                                                                                           | patients already reported in Christ, 2013 and Antwi, 2018                                    |  |
| 309 | Kerekou et al.              | 2019 | 1 29-yr-old patient                                                                                                                                                                                                                                                                                                     |   |                                                                                                          | hyperinsulinemic hypoglycemia                                 | corticosteroid                                                                                                            | possible case of adult nesidioblastosis                                                      |  |
| 310 | Wiesli et al.               | 2019 | 1 76-yr-old man; malignant, metastasizing somatostatinoma with hyperglycemia and postprandial hypoglycemia                                                                                                                                                                                                              |   | islet cell hyperplasia                                                                                   | hyperinsulinemic hypoglycemia                                 | autopsy finding                                                                                                           |                                                                                              |  |
| 311 | Lozano-Melendez et al.      | 2019 | 1 36-yr-old man; end stage chronic kidney disease (diagnosis with selective arterial calcium stimulation)                                                                                                                                                                                                               |   | nesidioblastosis                                                                                         | hyperinsulinemic hypoglycemia                                 | subtotal pancreatectomy                                                                                                   |                                                                                              |  |
| 312 | Dauriz et al.               | 2019 | 1 63-yr-old woman; distal pancreatectomy for insulinoma 4 years ago; insulinoma relapse                                                                                                                                                                                                                                 |   | nesidioblastosis; islet cell hyperplasia                                                                 | hyperinsulinemic hypoglycemia                                 | subtotal pancreatectomy (diazoxide and pasireotide did not work)                                                          | insulinoma with background nesidioblastosis                                                  |  |
| 313 | Allue et al.                | 2019 | 1 male, middle-aged                                                                                                                                                                                                                                                                                                     |   | nesidioblastosis                                                                                         |                                                               |                                                                                                                           | *                                                                                            |  |
| 314 | Wong et al.                 | 2019 | 1 67-yr-old woman; short bowel syndrome (secondary to accident); type 2 diabetes mellitus                                                                                                                                                                                                                               |   | nesidioblastosis                                                                                         | hyperinsulinemic hypoglycemia                                 | distal pancreatectomy + octreotide (diazoxide and acarbose did not work due to short gut syndrome)                        |                                                                                              |  |
| 315 | Kim et al.                  | 2019 | 1 (managed with GLP-1 agonist)                                                                                                                                                                                                                                                                                          |   | nesidioblastosis, islet cell hyperplasia                                                                 | hyperinsulinemic hypoglycemia                                 | total pancreatectomy                                                                                                      |                                                                                              |  |
| 316 | Gouta et al.                | 2019 | 2 44-yr-old woman and 52-yr-old woman                                                                                                                                                                                                                                                                                   |   | islet cell hyperplasia                                                                                   | hyperinsulinemic hypoglycemia                                 | caudal pancreatectomy/enucleation                                                                                         |                                                                                              |  |
| 317 | Orujov et al.               | 2019 | 1 49-yr-old woman; concomitant neuroendocrine tumor (distal pancreatectomy); post-Roux-en-Y-bypass                                                                                                                                                                                                                      |   | nesidioblastosis                                                                                         | hyperinsulinemic hypoglycemia                                 | distal pancreatectomy + completion pancreatectomy                                                                         | possibly post-gastric bypass nesidioblastosis or insulinoma with background nesidioblastosis |  |
| 318 | Delbeke et al.              | 2019 | 1 proven metastatic neuroendocrine tumor                                                                                                                                                                                                                                                                                |   | islet cell hyperplasia (more focal)                                                                      | not reported                                                  | distal pancreatectomy                                                                                                     |                                                                                              |  |
| 319 | Kalff et al.                | 2020 | 3 2x post-gastric bypass; 1x without prior gastric surgery; additionally: 3 medically controlled post-gastric bypass surgery patients with diffuse enrichment and one case of suspected non-insulinoma pancreatogenous hypoglycemia syndrome with diffuse tracer enrichment                                             | 4 | nesidioblastosis                                                                                         | hyperinsulinemic hypoglycemia                                 | distal pancreatectomy; 1 relapse with completion pancreatectomy                                                           |                                                                                              |  |
| 320 | Yamada et al.               | 2020 | 111 Nationwide survey in Japan; 33 classified as post-gastric bypass (23 males, 10 females; aged 1 to 89 years); 57 classified as postprandial hyperinsulinemic hypoglycemia (21 males, 36 females; 8 month - 91 years); 10 classified as nesidioblastosis (5 men, 5 women; 19- to 79 years; only 6 surgically proven), |   | nesidioblastosis                                                                                         | hyperinsulinemic hypoglycemia                                 | medical treatment or distal pancreatectomy in 6                                                                           |                                                                                              |  |
| 321 | Lopes et al.                | 2020 | 1 32-yr-old man; concomitant with pancreatic heterotopia                                                                                                                                                                                                                                                                |   | nesidioblastosis + pancreatic heterotopia (and nesidioblastosis in the ectopic pancreatic tissue)        | hyperinsulinemic hypoglycemia                                 | distal pancreatectomy                                                                                                     |                                                                                              |  |
| 322 | Antwi et al.                | 2020 | 1                                                                                                                                                                                                                                                                                                                       |   | nesidioblastosis                                                                                         | hyperinsulinemic hypoglycemia                                 | distal pancreatectomy                                                                                                     | unclear, if really adult                                                                     |  |
| 323 | Boss et al.                 | 2020 | 3 clinically suspected cases of nesidioblastosis (surgically not confirmed)                                                                                                                                                                                                                                             |   |                                                                                                          | hyperinsulinemic hypoglycemia                                 | no surgery performed                                                                                                      |                                                                                              |  |
| 324 | Awramiszyń-Fernandez et al. | 2020 | 1 non-surgical weight loss                                                                                                                                                                                                                                                                                              |   | nesidioblastosis                                                                                         | hyperinsulinemic hypoglycemia                                 |                                                                                                                           | unclear, if really adult*                                                                    |  |
| 325 | McManus et al.              | 2020 | 1 45-yr-old woman; approximately 10 years after Roux-en-Y gastric bypass                                                                                                                                                                                                                                                |   |                                                                                                          | hyperinsulinemic hypoglycemia                                 |                                                                                                                           | *                                                                                            |  |
| 326 | Kato et al.                 | 2021 | 1 73-yr-old man; on dialysis since 18 years                                                                                                                                                                                                                                                                             |   | nesidioblastosis                                                                                         | hyperinsulinemic hypoglycemia                                 | duodenopancreatectomy + continuous subcutaneous octreotide infusion + corticosteroids                                     |                                                                                              |  |
| 327 | Snaith et al.               | 2021 | 1 40-yr-old woman; recurrent hypoglycemia after multiple insulinoma resections; no MEN1                                                                                                                                                                                                                                 |   | islet cell hyperplasia/insulinomatosis/insulin-expressing monohormonal endocrine cell clusters           | hyperinsulinemic hypoglycemia                                 | total pancreatectomy with failure of cure                                                                                 |                                                                                              |  |
| 328 | Torres-Arao et al.          | 2021 | 1 31-yr-old                                                                                                                                                                                                                                                                                                             |   |                                                                                                          | hyperinsulinemic hypoglycemia                                 | surgery                                                                                                                   |                                                                                              |  |
| 329 | Castillo-López et al.       | 2022 | 1 15-yr-old man                                                                                                                                                                                                                                                                                                         |   | diffuse β-cell hyperplasia                                                                               | hyperinsulinemic hypoglycemia                                 | subtotal pancreatectomy (failure of diazoxide)                                                                            |                                                                                              |  |
| 330 | Koneshamoorthy et al.       | 2022 | 1 22-yr-old man; obese; activating mutation in Glucokinase (also found in mother, sister, and nephew)                                                                                                                                                                                                                   |   | diffuse β-cell hyperplasia                                                                               | hyperinsulinemic hypoglycemia                                 | distal pancreatectomy; postoperative failure of verapamil, diazoxide, and octreotide; pasireotide successful              | unclear, if really adult; first hypoglycemia episode as newborn                              |  |
| 331 | Doi et al.                  | 2022 | 1 55-yr-old woman                                                                                                                                                                                                                                                                                                       |   | focal nesidioblastosis (mimicking insulinoma); hyperplastic nodular formation; ductulo-insular complexes | hyperinsulinemia                                              | distal pancreatectomy                                                                                                     |                                                                                              |  |
|     |                             |      |                                                                                                                                                                                                                                                                                                                         |   |                                                                                                          |                                                               |                                                                                                                           |                                                                                              |  |
|     |                             |      |                                                                                                                                                                                                                                                                                                                         |   |                                                                                                          |                                                               |                                                                                                                           |                                                                                              |  |
|     |                             |      |                                                                                                                                                                                                                                                                                                                         |   |                                                                                                          |                                                               |                                                                                                                           |                                                                                              |  |
|     |                             |      |                                                                                                                                                                                                                                                                                                                         |   |                                                                                                          |                                                               |                                                                                                                           |                                                                                              |  |
|     |                             |      |                                                                                                                                                                                                                                                                                                                         |   |                                                                                                          |                                                               |                                                                                                                           |                                                                                              |  |
|     |                             |      |                                                                                                                                                                                                                                                                                                                         |   |                                                                                                          |                                                               |                                                                                                                           |                                                                                              |  |
|     |                             |      |                                                                                                                                                                                                                                                                                                                         |   |                                                                                                          |                                                               |                                                                                                                           |                                                                                              |  |
|     |                             |      |                                                                                                                                                                                                                                                                                                                         |   |                                                                                                          |                                                               |                                                                                                                           |                                                                                              |  |
|     |                             |      |                                                                                                                                                                                                                                                                                                                         |   |                                                                                                          |                                                               |                                                                                                                           |                                                                                              |  |
|     |                             |      |                                                                                                                                                                                                                                                                                                                         |   |                                                                                                          |                                                               |                                                                                                                           |                                                                                              |  |
|     |                             |      |                                                                                                                                                                                                                                                                                                                         |   |                                                                                                          |                                                               |                                                                                                                           |                                                                                              |  |
|     |                             |      |                                                                                                                                                                                                                                                                                                                         |   |                                                                                                          |                                                               |                                                                                                                           |                                                                                              |  |
|     |                             |      |                                                                                                                                                                                                                                                                                                                         |   |                                                                                                          |                                                               |                                                                                                                           |                                                                                              |  |
|     |                             |      |                                                                                                                                                                                                                                                                                                                         |   |                                                                                                          |                                                               |                                                                                                                           |                                                                                              |  |
|     |                             |      |                                                                                                                                                                                                                                                                                                                         |   |                                                                                                          |                                                               |                                                                                                                           |                                                                                              |  |
|     |                             |      |                                                                                                                                                                                                                                                                                                                         |   |                                                                                                          |                                                               |                                                                                                                           |                                                                                              |  |
|     |                             |      |                                                                                                                                                                                                                                                                                                                         |   |                                                                                                          |                                                               |                                                                                                                           |                                                                                              |  |
|     |                             |      |                                                                                                                                                                                                                                                                                                                         |   |                                                                                                          |                                                               |                                                                                                                           |                                                                                              |  |
|     |                             |      |                                                                                                                                                                                                                                                                                                                         |   |                                                                                                          |                                                               |                                                                                                                           |                                                                                              |  |
|     |                             |      |                                                                                                                                                                                                                                                                                                                         |   |                                                                                                          |                                                               |                                                                                                                           |                                                                                              |  |
|     |                             |      |                                                                                                                                                                                                                                                                                                                         |   |                                                                                                          |                                                               |                                                                                                                           |                                                                                              |  |
|     |                             |      |                                                                                                                                                                                                                                                                                                                         |   |                                                                                                          |                                                               |                                                                                                                           |                                                                                              |  |
|     |                             |      |                                                                                                                                                                                                                                                                                                                         |   |                                                                                                          |                                                               |                                                                                                                           |                                                                                              |  |
|     |                             |      |                                                                                                                                                                                                                                                                                                                         |   |                                                                                                          |                                                               |                                                                                                                           |                                                                                              |  |
|     |                             |      |                                                                                                                                                                                                                                                                                                                         |   |                                                                                                          |                                                               |                                                                                                                           |                                                                                              |  |
|     |                             |      |                                                                                                                                                                                                                                                                                                                         |   |                                                                                                          |                                                               |                                                                                                                           |                                                                                              |  |
|     |                             |      |                                                                                                                                                                                                                                                                                                                         |   |                                                                                                          |                                                               |                                                                                                                           |                                                                                              |  |
|     |                             |      |                                                                                                                                                                                                                                                                                                                         |   |                                                                                                          |                                                               |                                                                                                                           |                                                                                              |  |
|     |                             |      |                                                                                                                                                                                                                                                                                                                         |   |                                                                                                          |                                                               |                                                                                                                           |                                                                                              |  |
|     |                             |      |                                                                                                                                                                                                                                                                                                                         |   |                                                                                                          |                                                               |                                                                                                                           |                                                                                              |  |
|     |                             |      |                                                                                                                                                                                                                                                                                                                         |   |                                                                                                          |                                                               |                                                                                                                           |                                                                                              |  |
|     |                             |      |                                                                                                                                                                                                                                                                                                                         |   |                                                                                                          |                                                               |                                                                                                                           |                                                                                              |  |
|     |                             |      |                                                                                                                                                                                                                                                                                                                         |   |                                                                                                          |                                                               |                                                                                                                           |                                                                                              |  |
|     |                             |      |                                                                                                                                                                                                                                                                                                                         |   |                                                                                                          |                                                               |                                                                                                                           |                                                                                              |  |
|     |                             |      |                                                                                                                                                                                                                                                                                                                         |   |                                                                                                          |                                                               |                                                                                                                           |                                                                                              |  |
|     |                             |      |                                                                                                                                                                                                                                                                                                                         |   |                                                                                                          |                                                               |                                                                                                                           |                                                                                              |  |
|     |                             |      |                                                                                                                                                                                                                                                                                                                         |   |                                                                                                          |                                                               |                                                                                                                           |                                                                                              |  |
|     |                             |      |                                                                                                                                                                                                                                                                                                                         |   |                                                                                                          |                                                               |                                                                                                                           |                                                                                              |  |
|     |                             |      |                                                                                                                                                                                                                                                                                                                         |   |                                                                                                          |                                                               |                                                                                                                           |                                                                                              |  |
|     |                             |      |                                                                                                                                                                                                                                                                                                                         |   |                                                                                                          |                                                               |                                                                                                                           |                                                                                              |  |
|     |                             |      |                                                                                                                                                                                                                                                                                                                         |   |                                                                                                          |                                                               |                                                                                                                           |                                                                                              |  |
|     |                             |      |                                                                                                                                                                                                                                                                                                                         |   |                                                                                                          |                                                               |                                                                                                                           |                                                                                              |  |
|     |                             |      |                                                                                                                                                                                                                                                                                                                         |   |                                                                                                          |                                                               |                                                                                                                           |                                                                                              |  |
|     |                             |      |                                                                                                                                                                                                                                                                                                                         |   |                                                                                                          |                                                               |                                                                                                                           |                                                                                              |  |
|     |                             |      |                                                                                                                                                                                                                                                                                                                         |   |                                                                                                          |                                                               |                                                                                                                           |                                                                                              |  |
|     |                             |      |                                                                                                                                                                                                                                                                                                                         |   |                                                                                                          |                                                               |                                                                                                                           |                                                                                              |  |
|     |                             |      |                                                                                                                                                                                                                                                                                                                         |   |                                                                                                          |                                                               |                                                                                                                           |                                                                                              |  |
|     |                             |      |                                                                                                                                                                                                                                                                                                                         |   |                                                                                                          |                                                               |                                                                                                                           |                                                                                              |  |
|     |                             |      |                                                                                                                                                                                                                                                                                                                         |   |                                                                                                          |                                                               |                                                                                                                           |                                                                                              |  |
|     |                             |      |                                                                                                                                                                                                                                                                                                                         |   |                                                                                                          |                                                               |                                                                                                                           |                                                                                              |  |
|     |                             |      |                                                                                                                                                                                                                                                                                                                         |   |                                                                                                          |                                                               |                                                                                                                           |                                                                                              |  |
|     |                             |      |                                                                                                                                                                                                                                                                                                                         |   |                                                                                                          |                                                               |                                                                                                                           |                                                                                              |  |
|     |                             |      |                                                                                                                                                                                                                                                                                                                         |   |                                                                                                          |                                                               |                                                                                                                           |                                                                                              |  |
|     |                             |      |                                                                                                                                                                                                                                                                                                                         |   |                                                                                                          |                                                               |                                                                                                                           |                                                                                              |  |
|     |                             |      |                                                                                                                                                                                                                                                                                                                         |   |                                                                                                          |                                                               |                                                                                                                           |                                                                                              |  |
|     |                             |      |                                                                                                                                                                                                                                                                                                                         |   |                                                                                                          |                                                               |                                                                                                                           |                                                                                              |  |
|     |                             |      |                                                                                                                                                                                                                                                                                                                         |   |                                                                                                          |                                                               |                                                                                                                           |                                                                                              |  |
|     |                             |      |                                                                                                                                                                                                                                                                                                                         |   |                                                                                                          |                                                               |                                                                                                                           |                                                                                              |  |
|     |                             |      |                                                                                                                                                                                                                                                                                                                         |   |                                                                                                          |                                                               |                                                                                                                           |                                                                                              |  |

[illegible]
